# Supplementary material for: Determination of reference intervals for common chemistry and immunoassay tests for Kenyan adults based on an internationally harmonized protocol and up-to-date statistical methods
Source: PubMed Central journal article supplement (PMC7347104; doi:10.1371/journal.pone.0235234), 2020-07-09

SDRsex=0.00 SDRage M=0.38, F=0.35

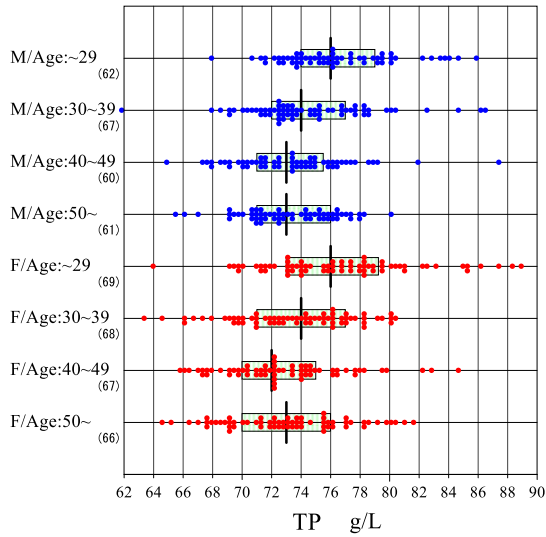

SDRsex=**0.50** SDRage M=**0.56**, F=**0.53**

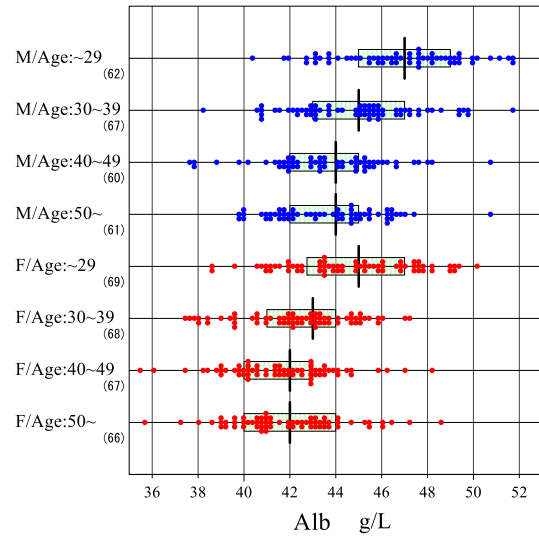

SDRsex=0.32 SDRage M=0.00, F=0.00

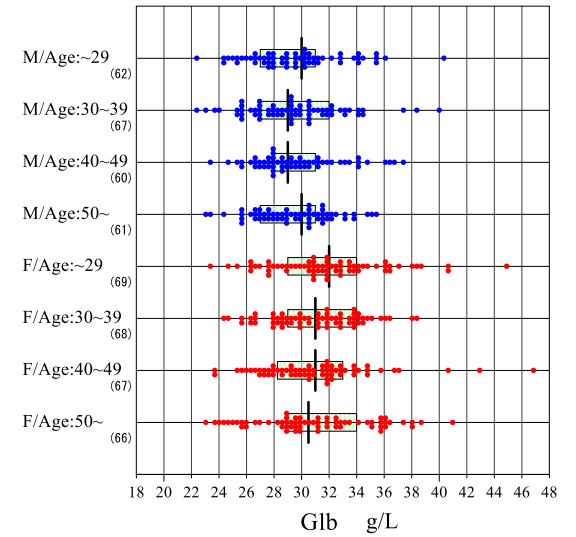

SDRsex=0.30 SDRage M=0.21, F=**0.42**

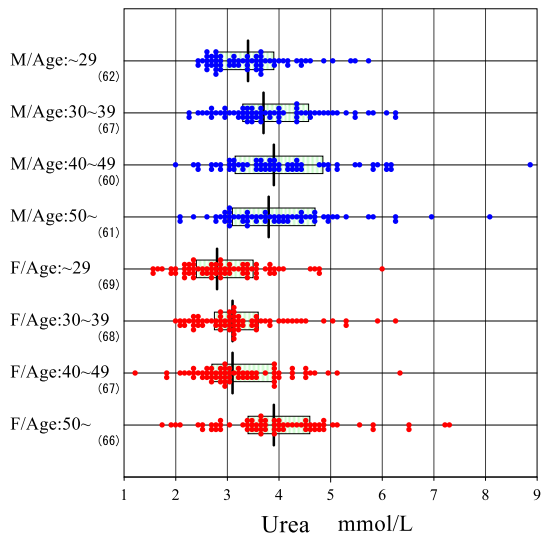

SDRsex=**0.89** SDRage M=**0.41**, F=0.33

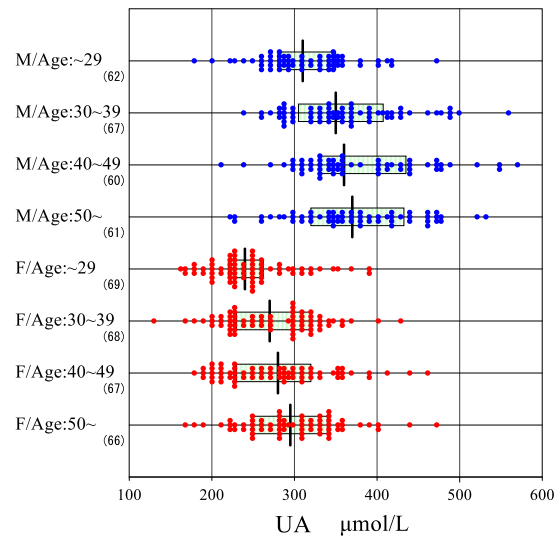

SDRsex=**1.19** SDRage M=0.30, F=0.14

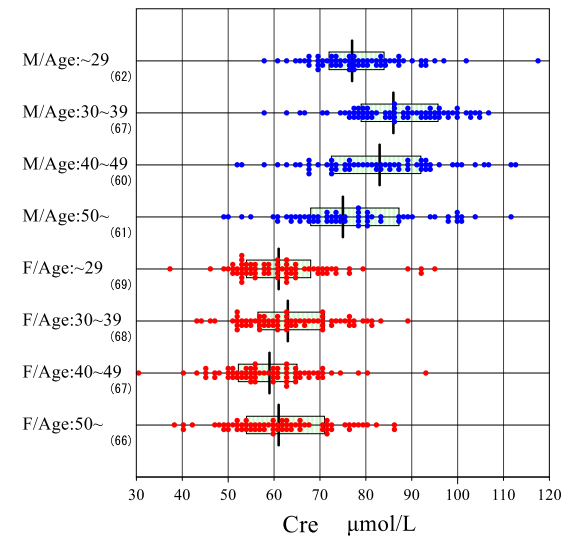

SDRsex=**0.48** SDRage M=0.21, F=0.32

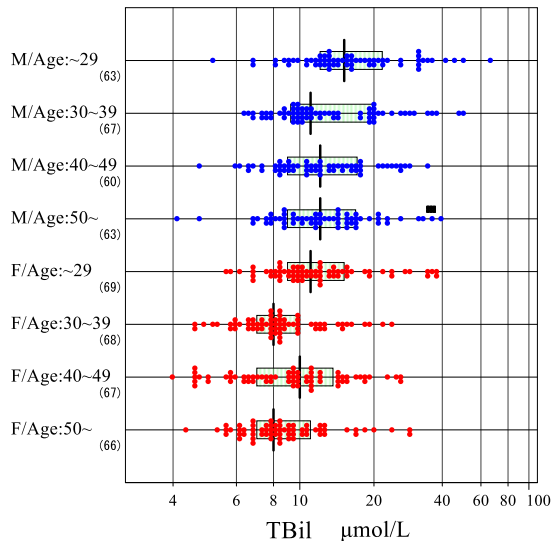

SDRsex=0.00 SDRage M=0.14, F=**0.47**

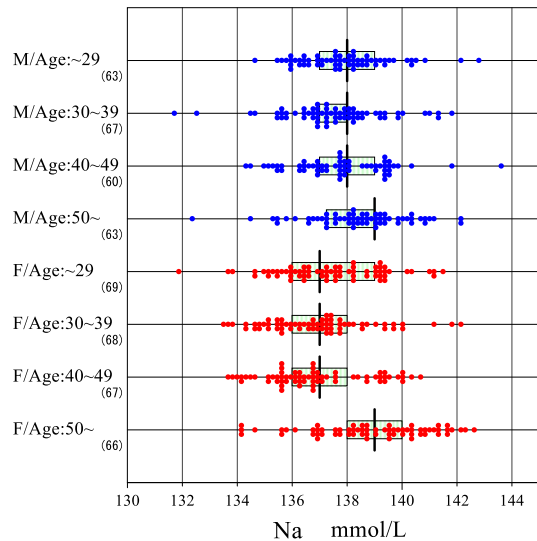

SDRsex=0.00 SDRage M=0.22, F=0.25

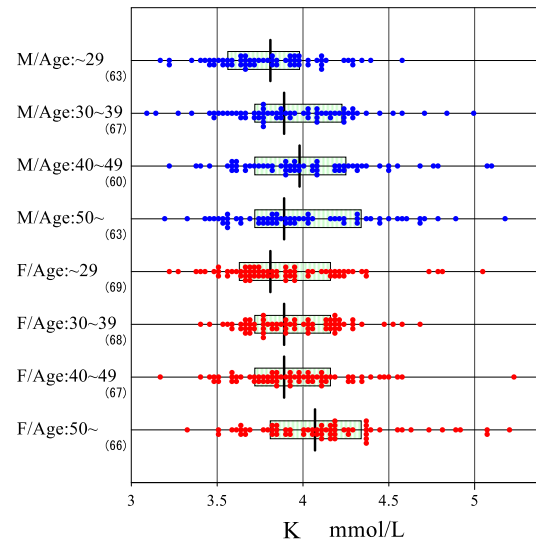

SDRsex=**0.44** SDRage M=0.38, F=0.18

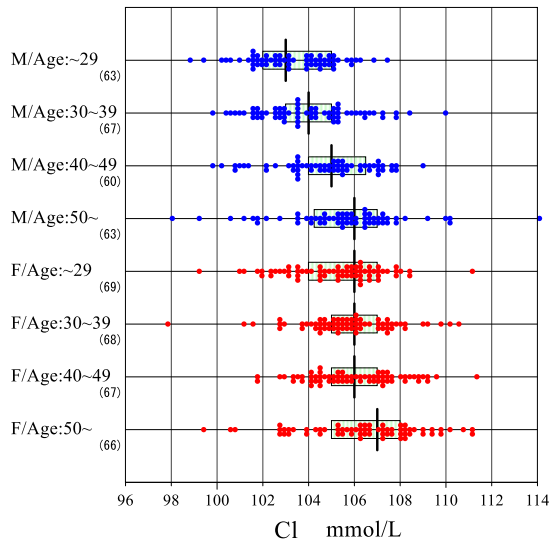

SDRsex=0.16 SDRage M=0.31, F=0.26

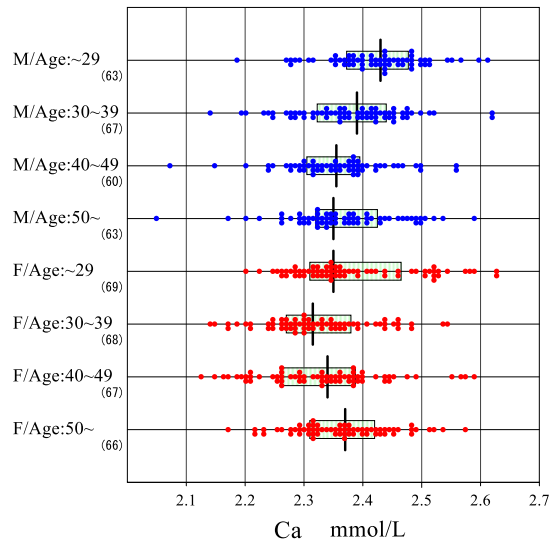

SDRsex=0.21 SDRage M=0.22, F=0.17

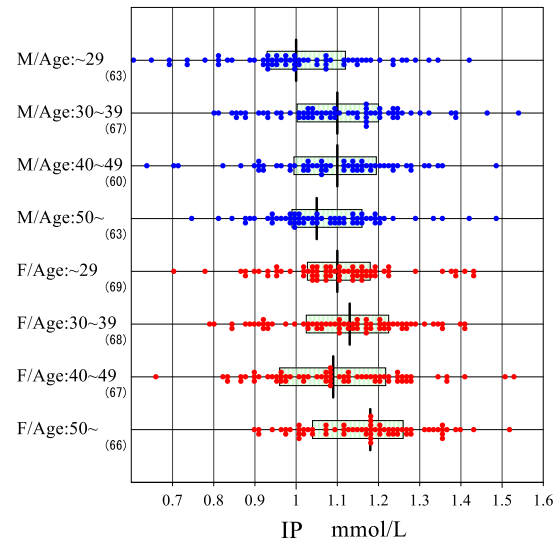

SDRsex=0.00 SDRage M=0.38, F=0.52

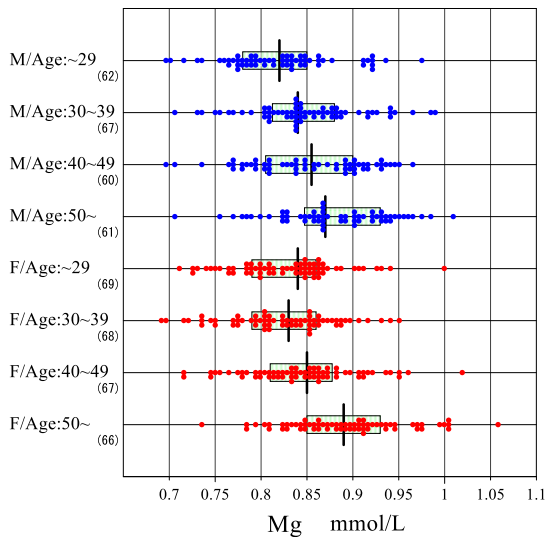

SDRsex=0.00 SDRage M=0.44, F=0.39

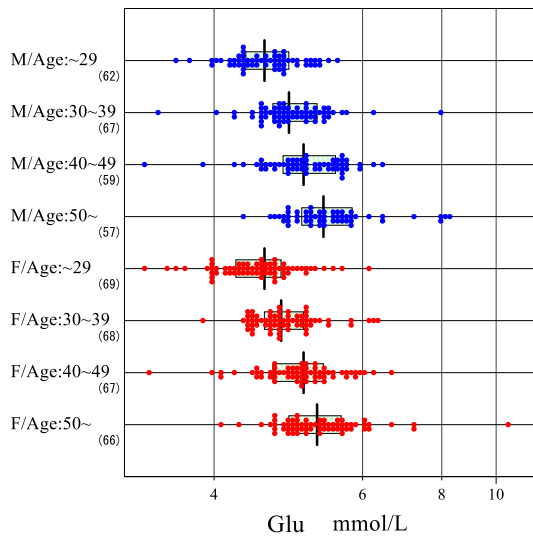

SDRsex=0.00 SDRage M=0.41, F=0.42

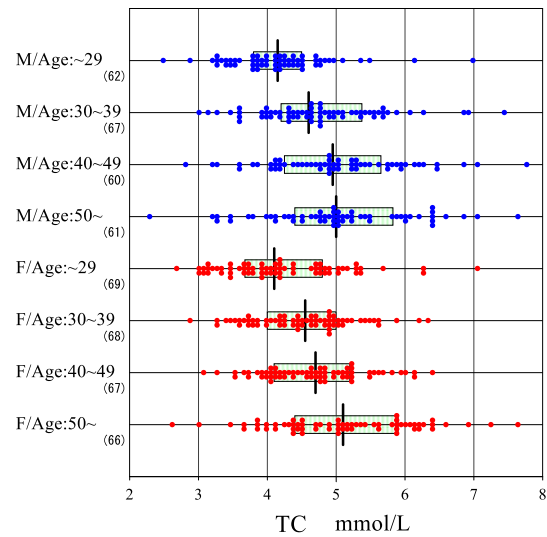

SDRsex=0.22 SDRage M=0.56, F=0.60

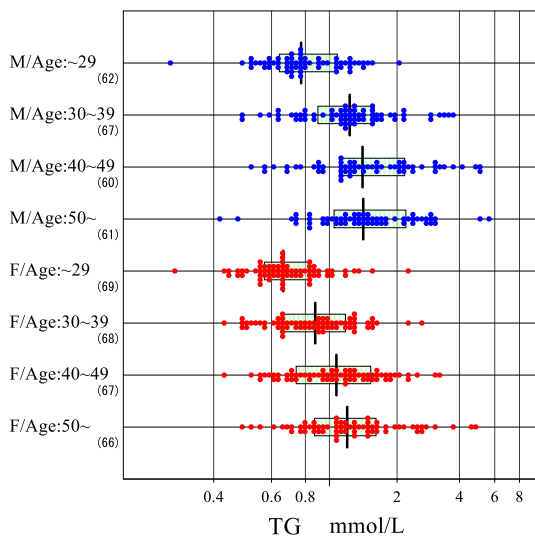

SDRsex=0.33 SDRage M=0.00, F=0.00

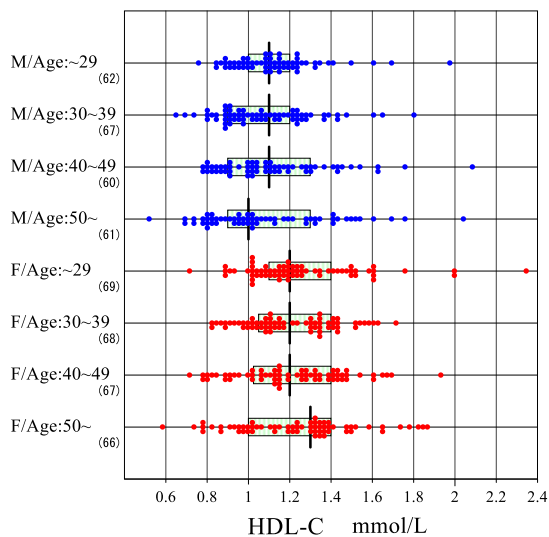

SDRsex=0.33 SDRage M=0.39, F=0.37

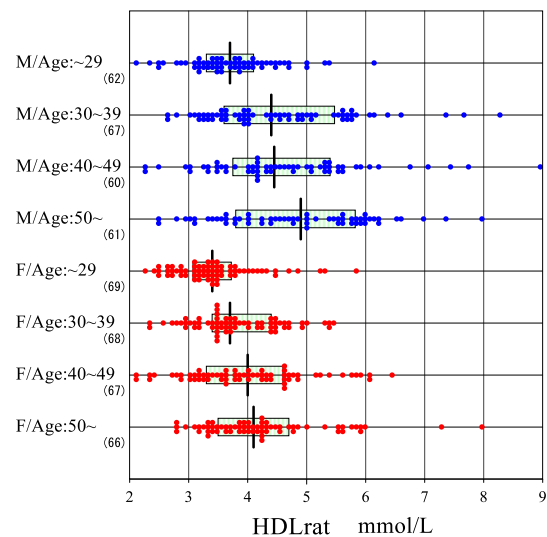

SDRsex=0.00 SDRage M=0.44, F=0.46

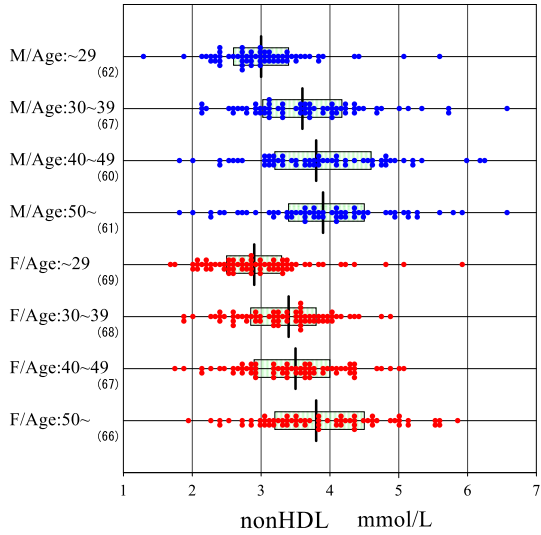

SDRsex=0.00 SDRage M=0.40, F=0.43

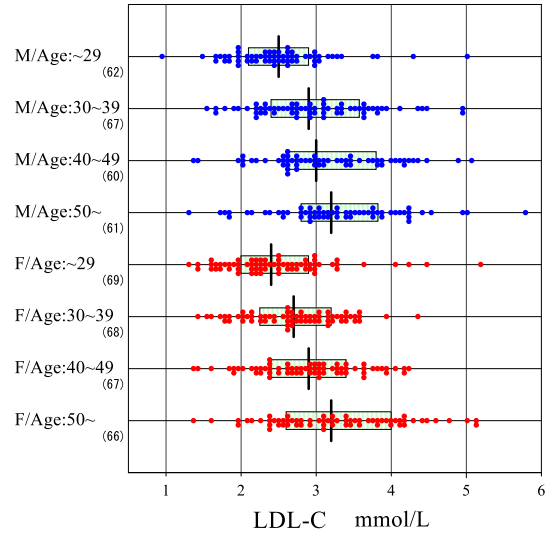

SDRsex=0.07 SDRage M=0.17, F=0.15

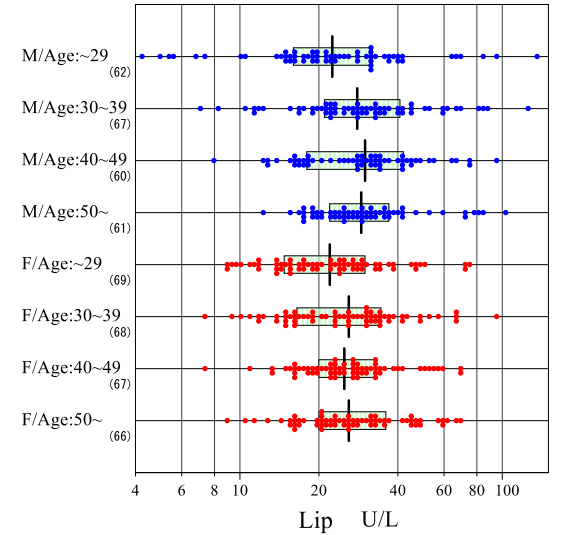

SDRsex=0.56 SDRage M=0.31, F=0.52

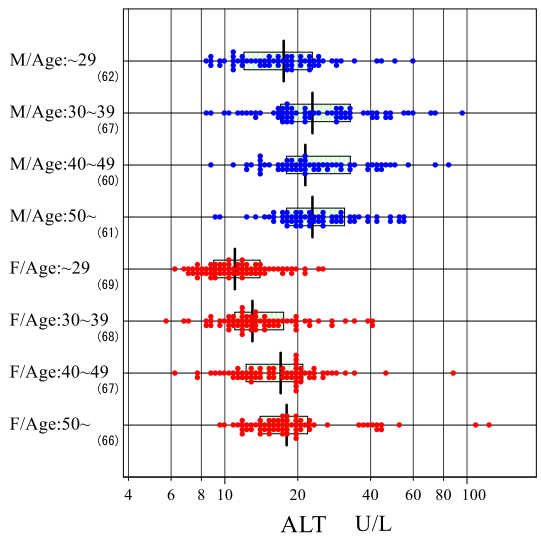

SDRsex=0.48 SDRage M=0.09, F=0.34

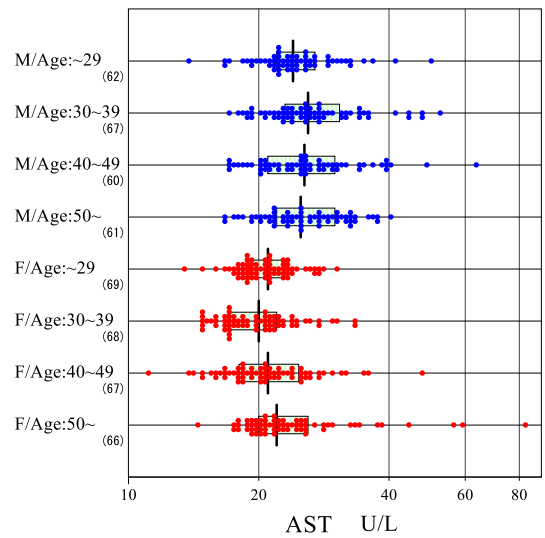

SDRsex=0.00 SDRage M=0.16, F=0.66

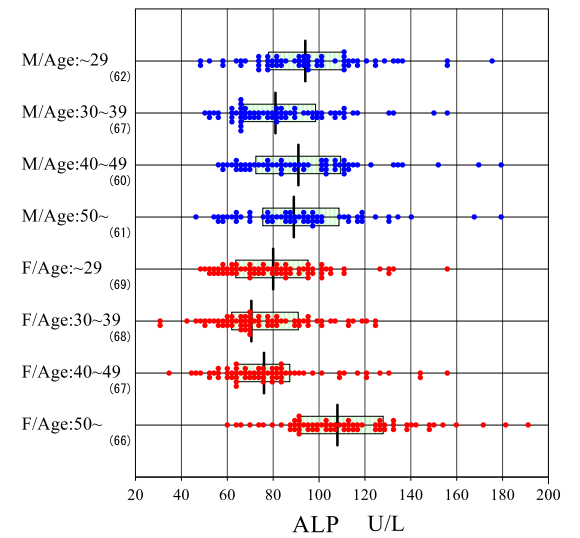

SDRsex=0.05 SDRage M=0.00, F=0.00

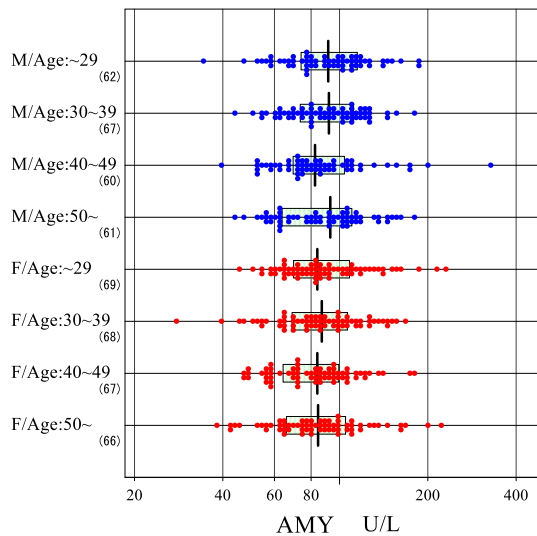

SDRsex=0.00 SDRage M=0.00, F=0.31

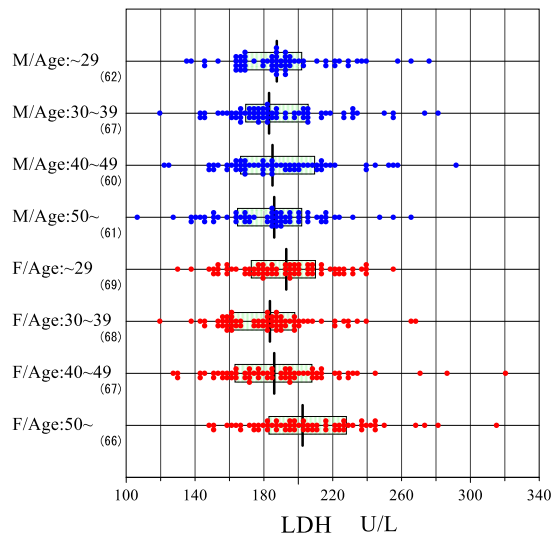

SDRsex=**0.50** SDRage M=0.02, F=0.12

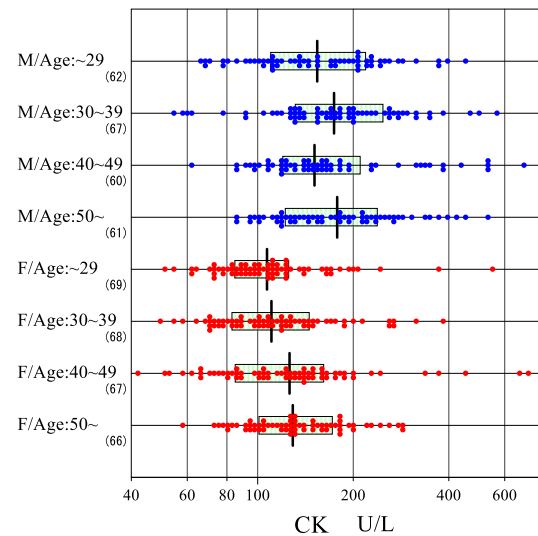

SDRsex=**0.51** SDRage M=0.35, F=0.14

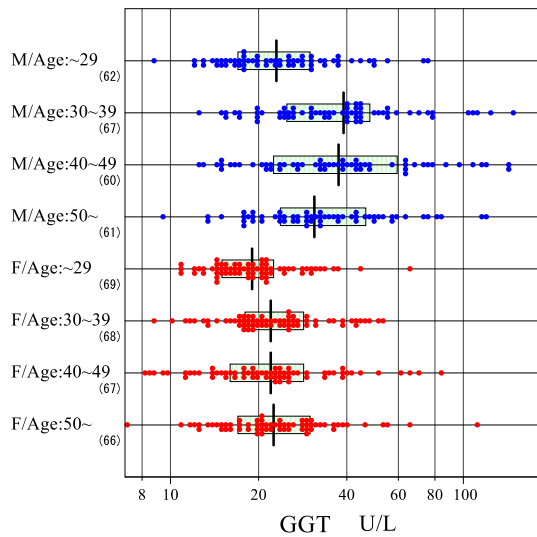

SDRsex=0.10 SDRage M=0.37, F=0.25

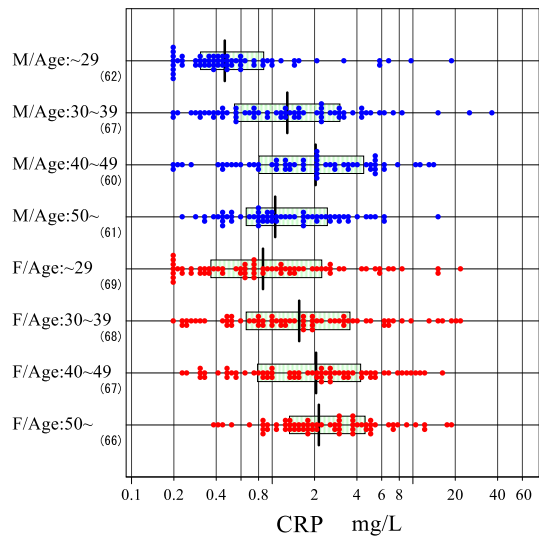

SDRsex=0.39 SDRage M=0.10, F=0.08

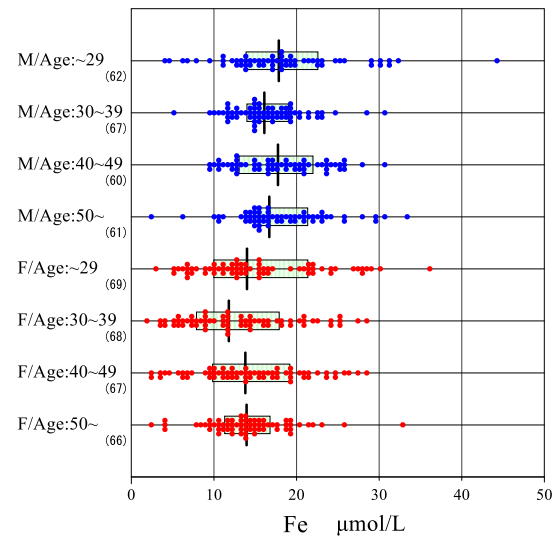

SDRsex=**0.78** SDRage M=0.22, F=**0.45**

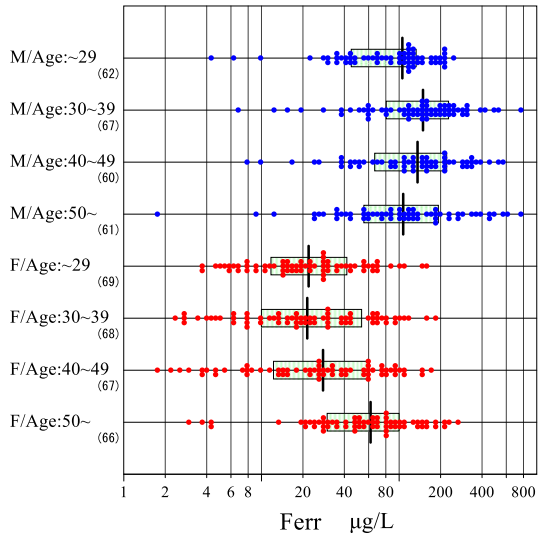

SDRsex=**0.43** SDRage M=0.18, F=0.18

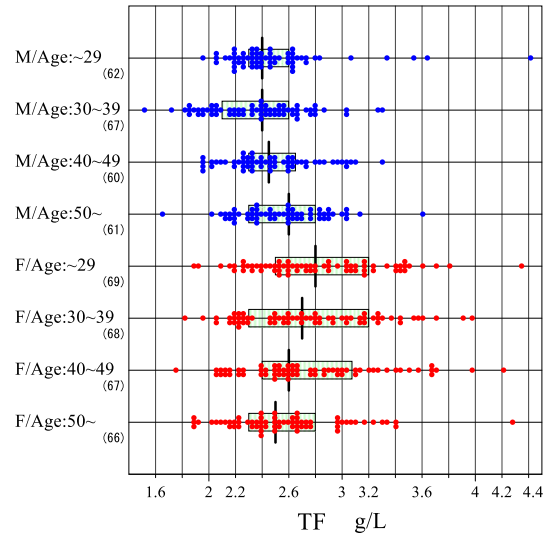

SDRsex=**0.50** SDRage M=0.00, F=0.00

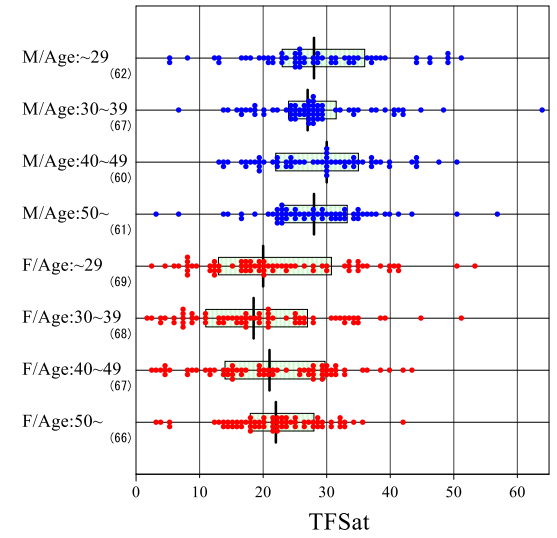

SDRsex=0.10 SDRage M=0.17, F=0.07

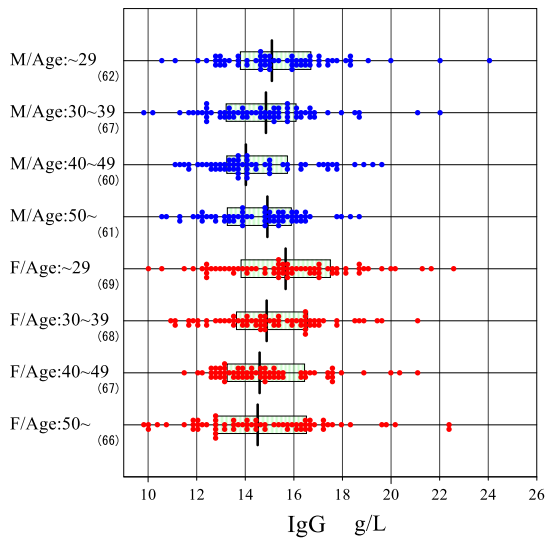

SDRsex=0.00 SDRage M=0.15, F=0.31

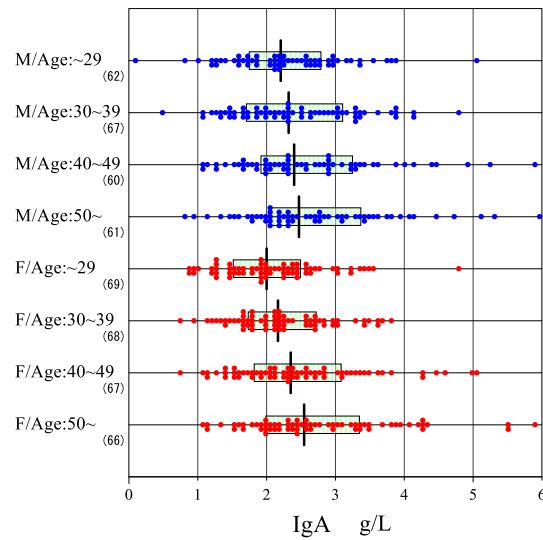

SDRsex=**0.48** SDRage M=0.15, F=0.08

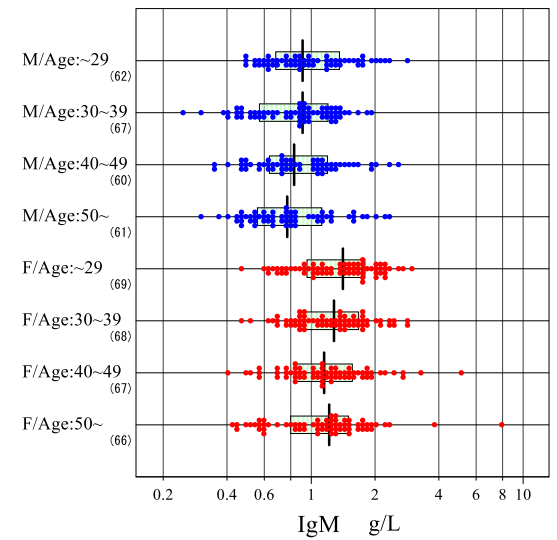

SDRsex=0.12 SDRage M=0.00, F=0.09

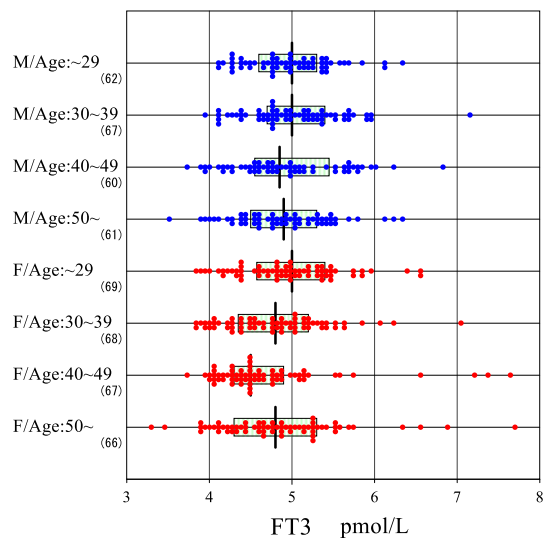

SDRsex=0.00 SDRage M=0.35, F=0.37

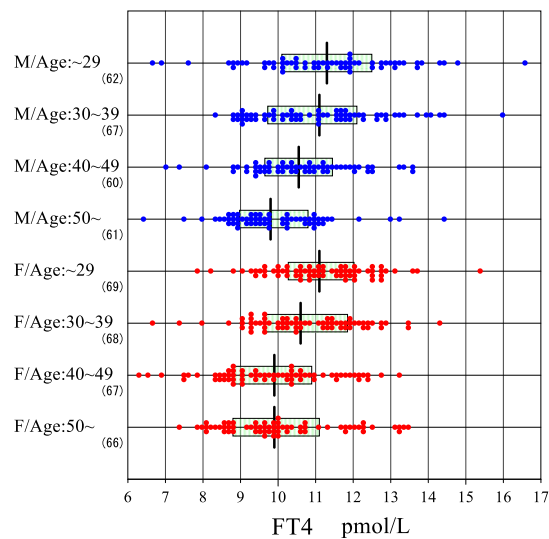

SDRsex=0.00 SDRage M=0.00, F=0.03

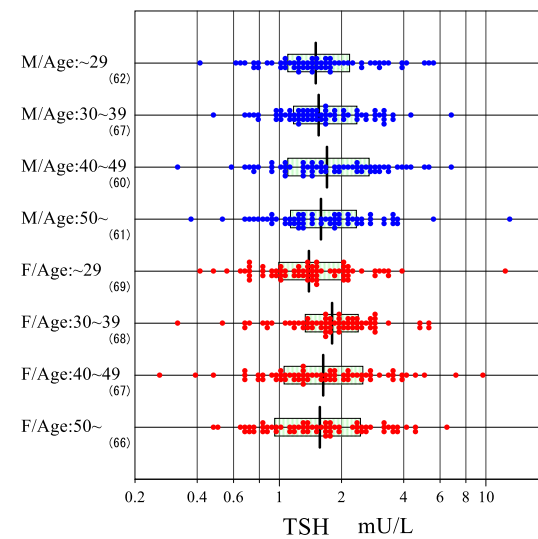

SDRsex=0.00 SDRage M=0.27, F=0.28

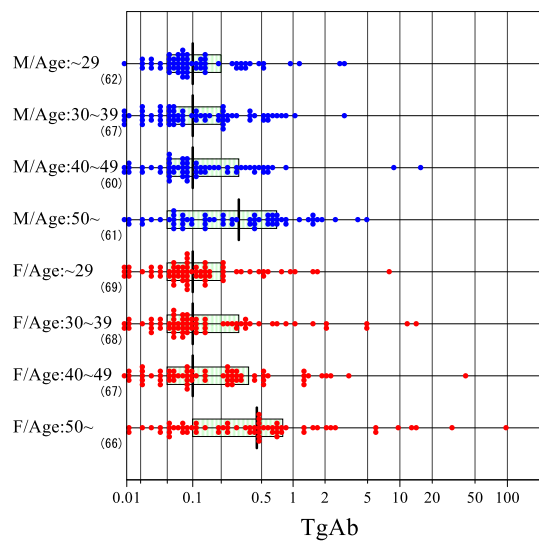

SDRsex=0.09 SDRage M=0.06, F=0.03

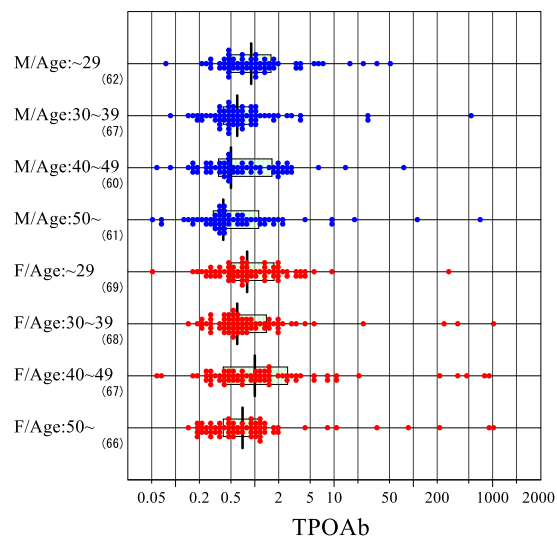

SDRsex=0.00 SDRage M=0.39, F=0.00

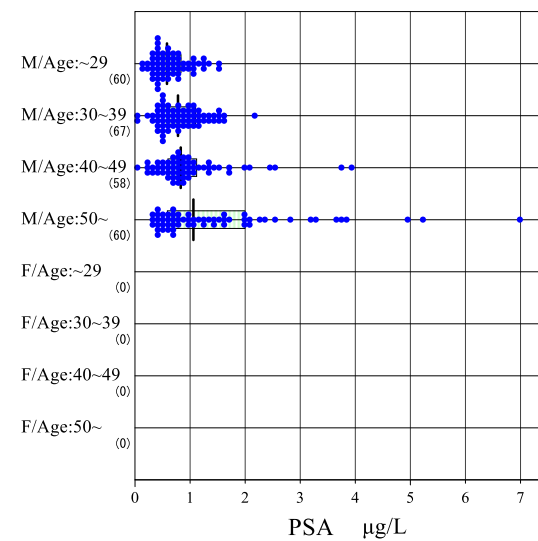

SDRsex=0.00 SDRage M=0.00, F=0.09

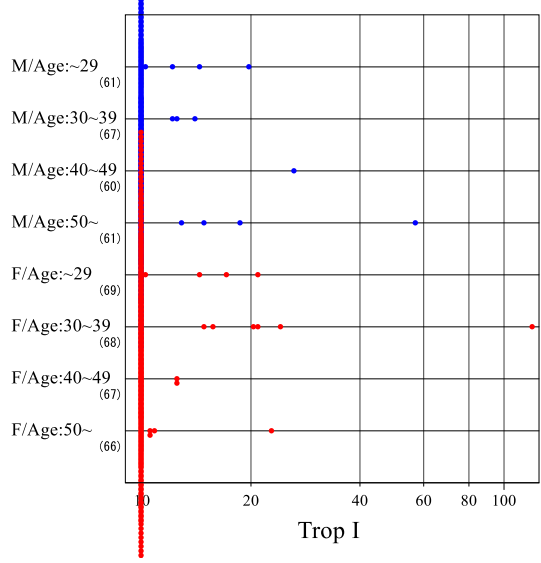

Supplement: pone.0235234.s001.pdf [file pone.0235234.s001.pdf]
