# Supplementary material for: Determination of reference intervals for common chemistry and immunoassay tests for Kenyan adults based on an internationally harmonized protocol and up-to-date statistical methods
Source: PubMed Central journal article supplement (PMC7347104; doi:10.1371/journal.pone.0235234), 2020-07-09

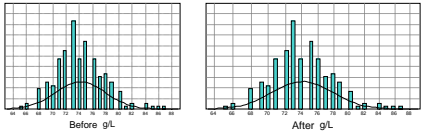

TP(g/L) M n=197  
 Para: 67.1 ~ 74.0 ~ 81.7  
 Nonpara: 67.2 ~ 73.8 ~ 82.4  
 Pow=0.888 TPos=62.31  
 Kurt=2.844 Skew=0.131

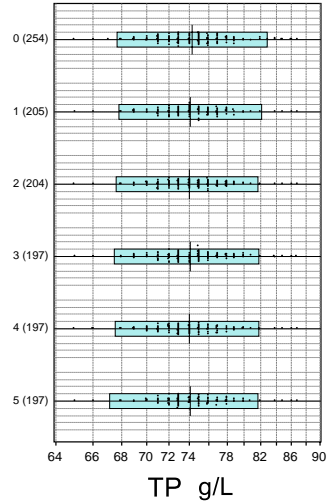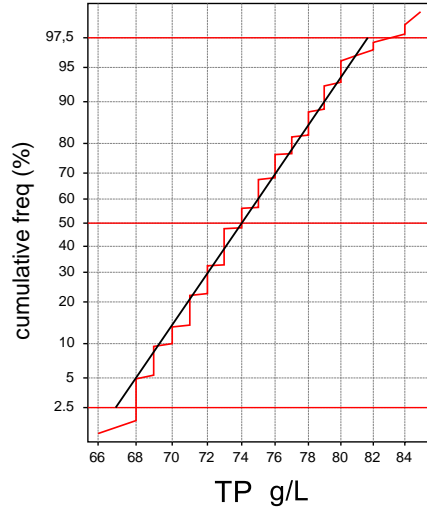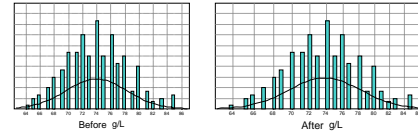

TP(g/L) F n=222  
 Para: 66.0 ~ 73.8 ~ 83.0  
 Nonpara: 65.9 ~ 73.9 ~ 83.7  
 Pow=0.779 TPos=60.383  
 Kurt=2.642 Skew=-0.032

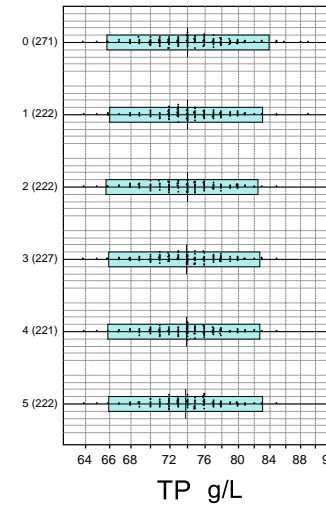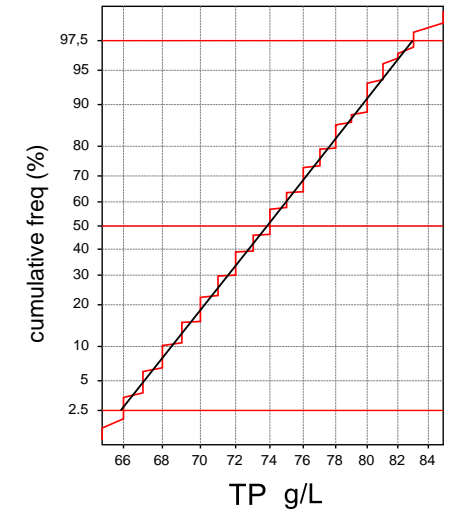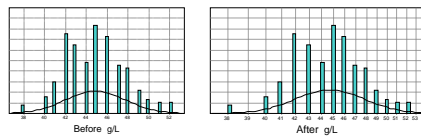

Alb(g/L) M n=202  
 Para: 39.84 ~ 44.64 ~ 51.17  
 Nonpara: 40.06 ~ 45.00 ~ 51.09  
 Pow=0.655 TPos=36.893  
 Kurt=2.751 Skew=-0.173

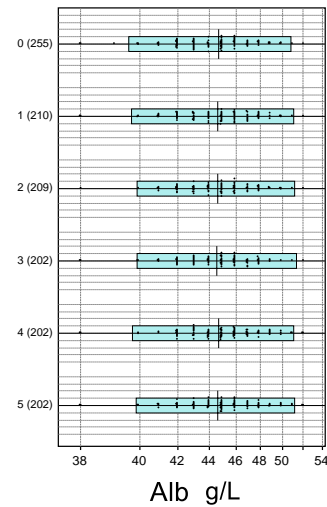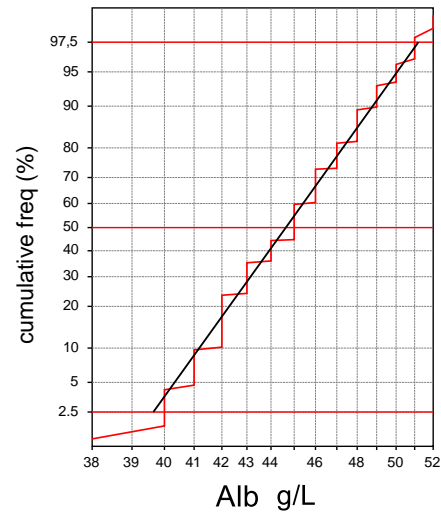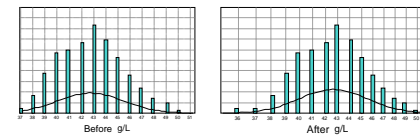

Alb(g/L) F n=226  
 Para: 37.80 ~ 42.65 ~ 48.46  
 Nonpara: 37.87 ~ 42.90 ~ 48.28  
 Pow=0.779 TPos=34.566  
 Kurt=2.579 Skew=-0.094

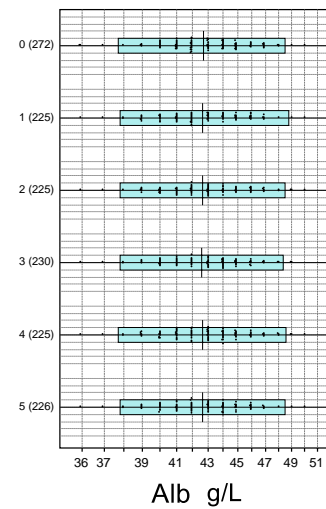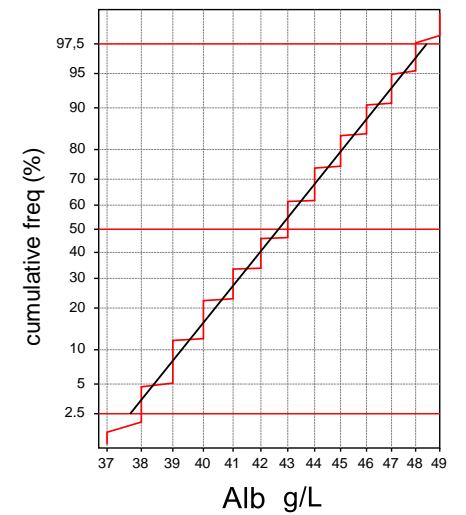

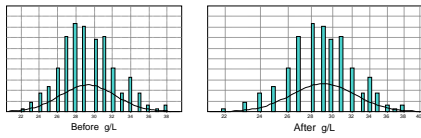

Glb(g/L) M n=200  
 Para: 24.06 ~ 29.10 ~ 35.89  
 Nonpara: 23.75 ~ 29.00 ~ 35.71  
 Pow=0.644 TPos=21  
 Kurt=2.828 Skew=-0.007

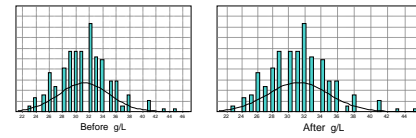

Glb(g/L) F n=225  
 Para: 23.73 ~ 31.18 ~ 38.42  
 Nonpara: 24.22 ~ 31.30 ~ 41.22  
 Pow=1.09 TPos=18.125  
 Kurt=2.652 Skew=-0.014

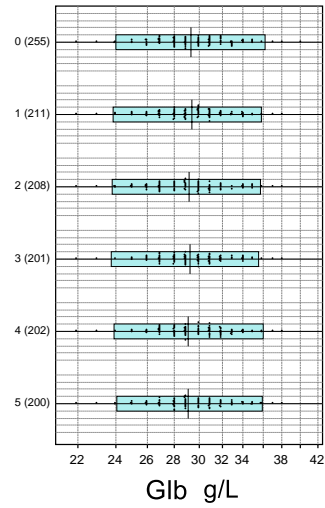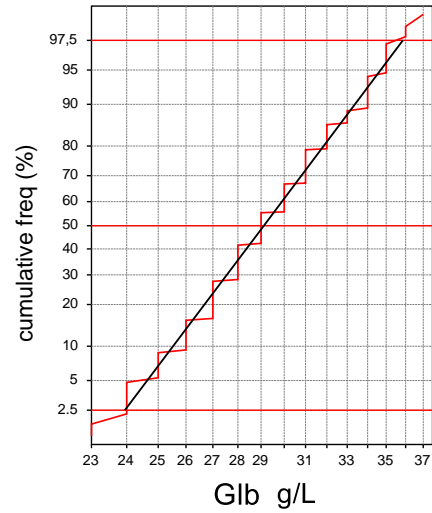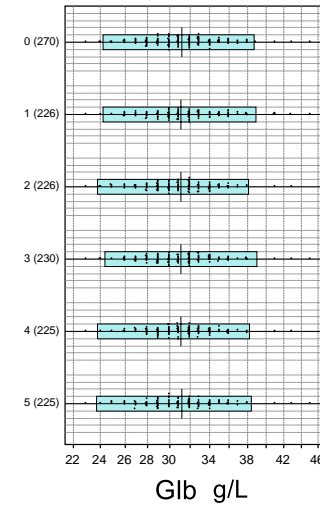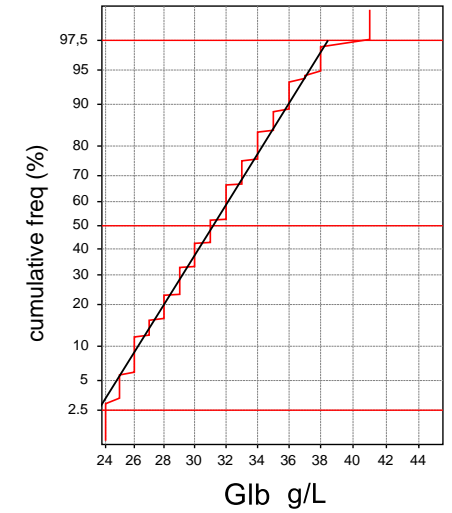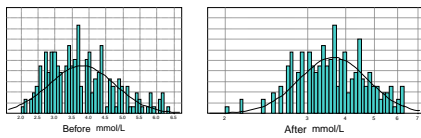

Urea(mmol/L) M n=198  
 Para: 2.32 ~ 3.64 ~ 6.18  
 Nonpara: 2.32 ~ 3.67 ~ 5.97  
 Pow=0.424 TPos=1.938  
 Kurt=2.588 Skew=-0.097

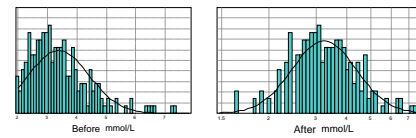

Urea(mmol/L) F n=222  
 Para: 1.900 ~ 3.213 ~ 5.768  
 Nonpara: 1.816 ~ 3.180 ~ 5.939  
 Pow=0.345 TPos=1.312  
 Kurt=2.824 Skew=0.113

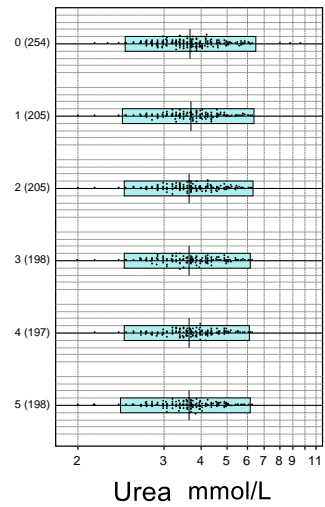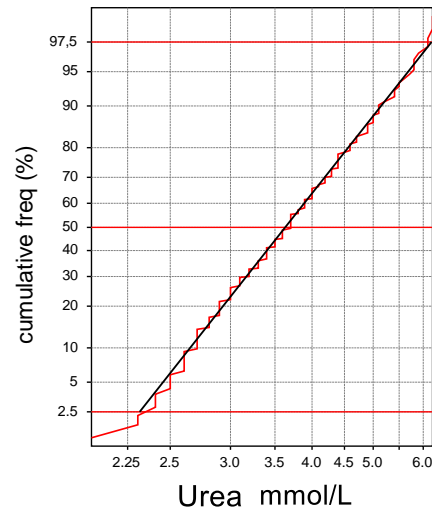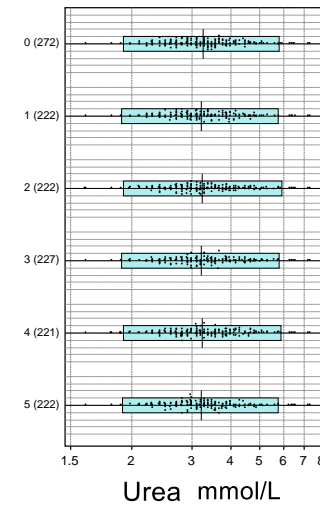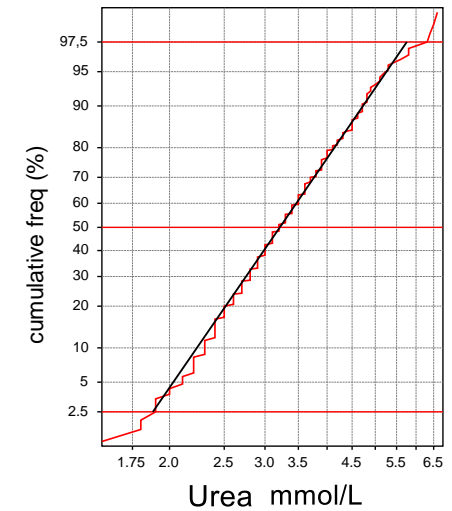

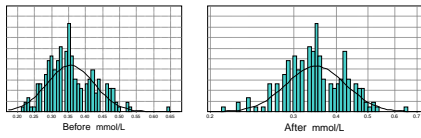

UA(mmol/L) M n=203  
 Para: 0.243 ~ 0.346 ~ 0.524  
 Nonpara: 0.233 ~ 0.348 ~ 0.496  
 Pow=0.406 TPos=0.186  
 Kurt=2.735 Skew=-0.068

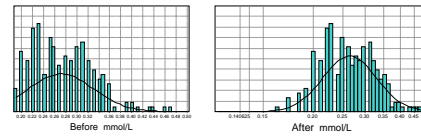

UA(mmol/L) F n=226  
 Para: 0.179 ~ 0.265 ~ 0.412  
 Nonpara: 0.178 ~ 0.267 ~ 0.402  
 Pow=0.436 TPos=0.138  
 Kurt=2.655 Skew=-0.102

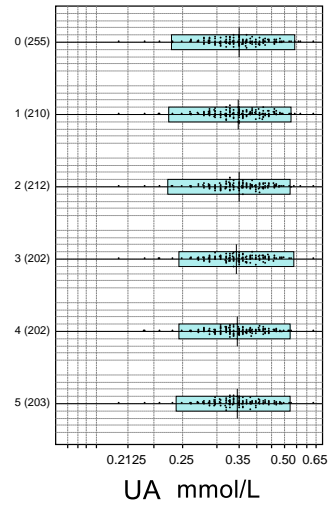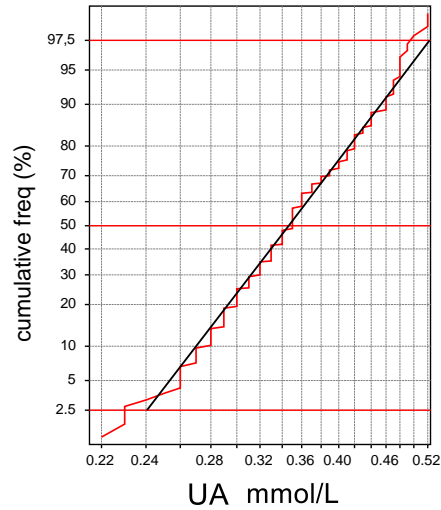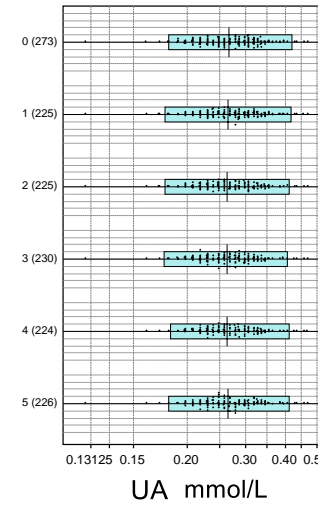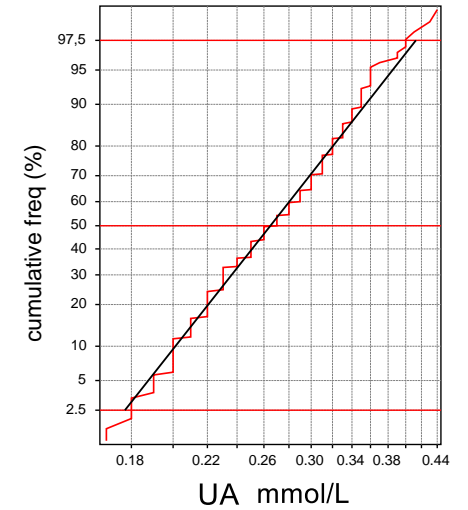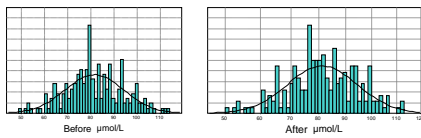

Cre(µmol/L) M n=198  
 Para: 58.4 ~ 81.5 ~ 108.1  
 Nonpara: 56.7 ~ 80.6 ~ 107.0  
 Pow=0.795 TPos=42.011  
 Kurt=2.586 Skew=0.056

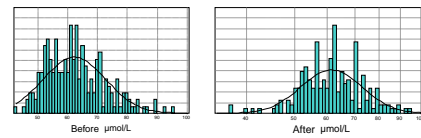

Cre(µmol/L) F n=222  
 Para: 45.15 ~ 61.45 ~ 85.21  
 Nonpara: 43.47 ~ 61.40 ~ 85.59  
 Pow=0.59 TPos=37.159  
 Kurt=2.78 Skew=0.06

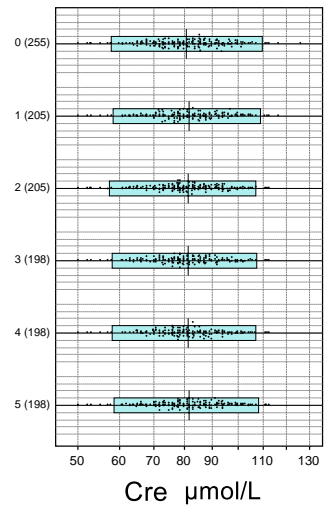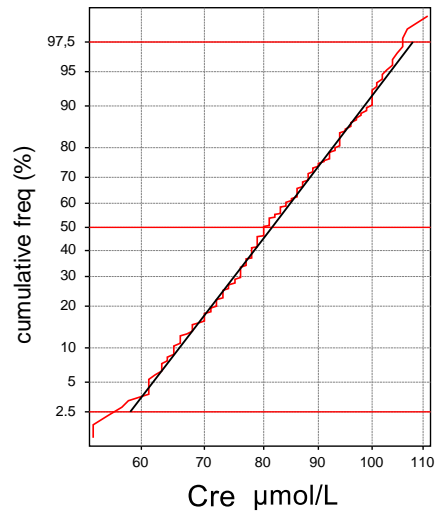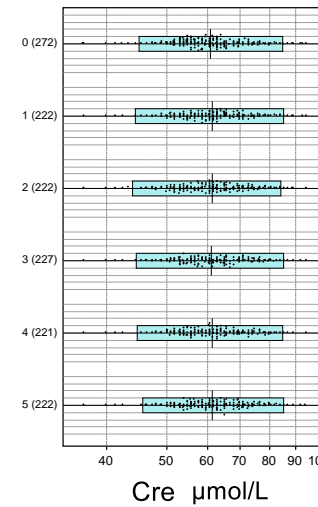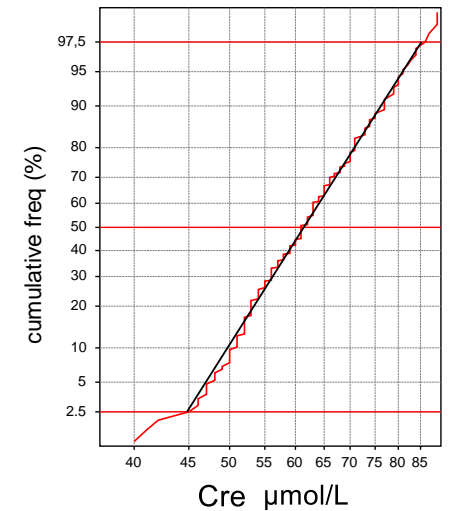

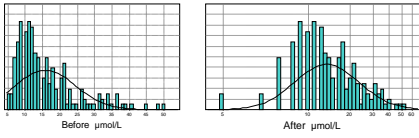

TBil(µmol/L) M n=197  
 Para: 6.25 ~ 13.46 ~ 39.40  
 Nonpara: 5.92 ~ 13.00 ~ 37.96  
 Pow=0.16 TPos=4.709  
 Kurt=2.605 Skew=0.177

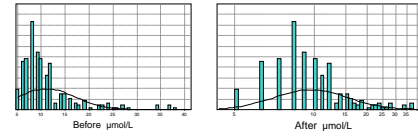

TBil(µmol/L) F n=221  
 Para: 5.06 ~ 9.55 ~ 25.86  
 Nonpara: 5.04 ~ 9.30 ~ 29.48  
 Pow=0.15 TPos=4.008  
 Kurt=2.938 Skew=0.342

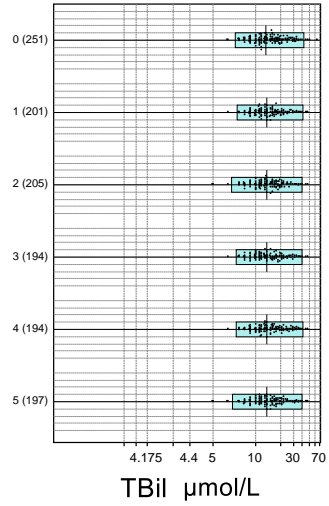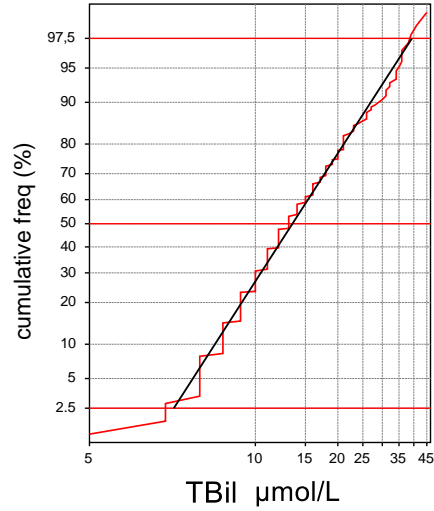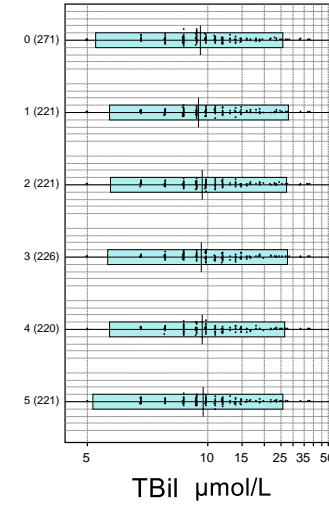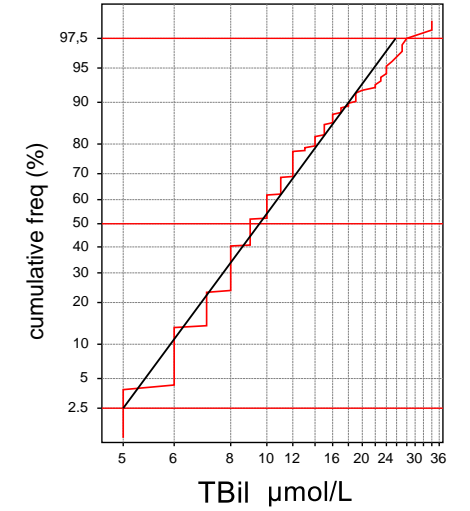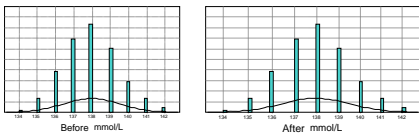

Na(mmol/L) M n=195  
 Para: 135.0 ~ 137.9 ~ 141.2  
 Nonpara: 134.8 ~ 138.0 ~ 141.4  
 Pow=0.883 TPos=132.768  
 Kurt=2.717 Skew=0.059

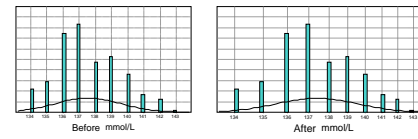

Na(mmol/L) F n=221  
 Para: 134.1 ~ 137.4 ~ 142.0  
 Nonpara: 134.0 ~ 137.0 ~ 141.8  
 Pow=0.585 TPos=132.061  
 Kurt=2.517 Skew=0.02

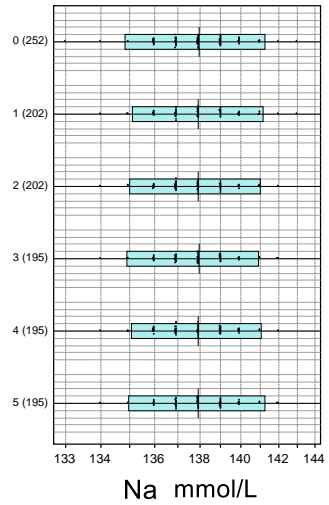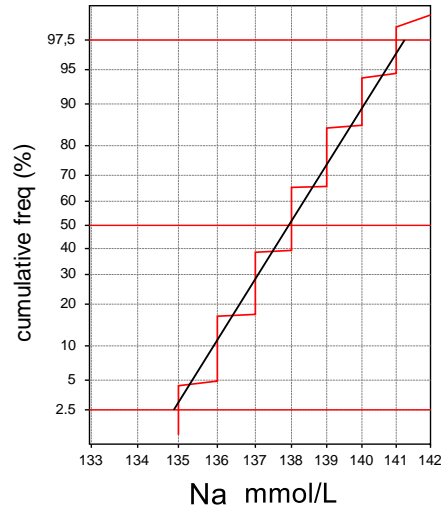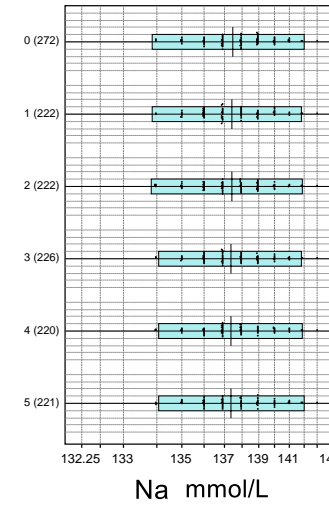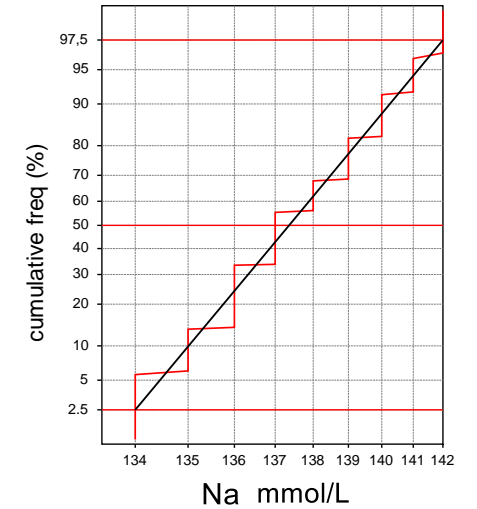

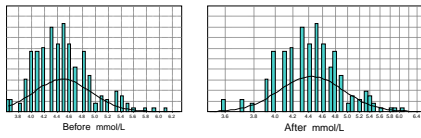

K(mmol/L) M n=198  
 Para: 3.76 ~ 4.43 ~ 5.47  
 Nonpara: 3.72 ~ 4.43 ~ 5.50  
 Pow=0.5 TPos=3.419  
 Kurt=2.907 Skew=0.011

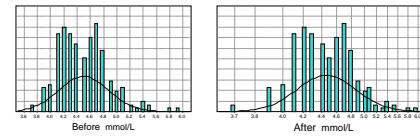

K(mmol/L) F n=222  
 Para: 3.89 ~ 4.46 ~ 5.36  
 Nonpara: 3.89 ~ 4.47 ~ 5.35  
 Pow=0.501 TPos=3.609  
 Kurt=2.788 Skew=-0.095

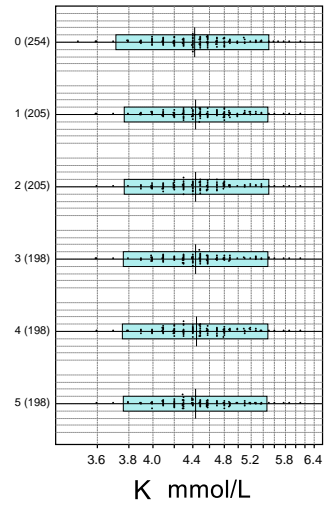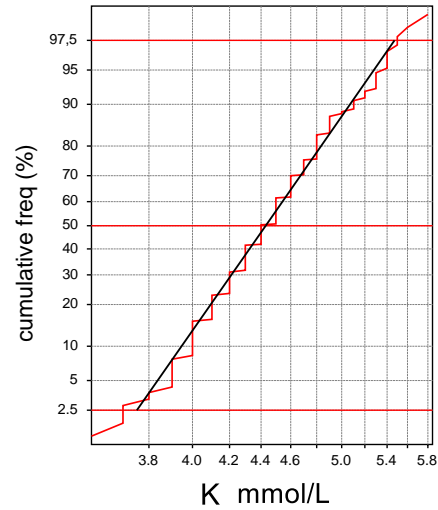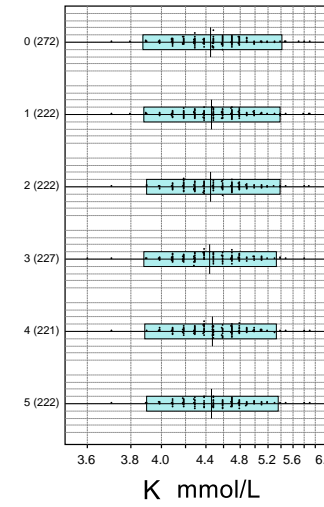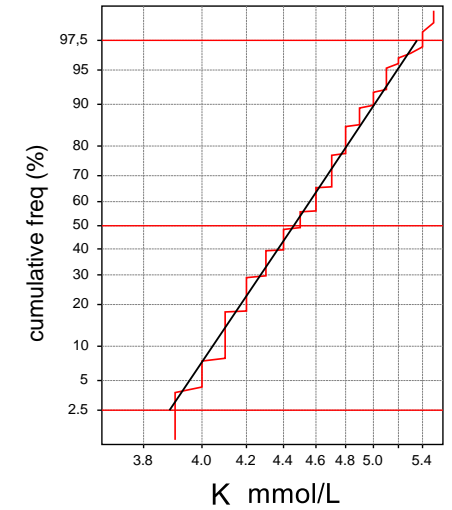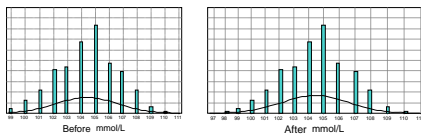

Cl(mmol/L) M n=198  
 Para: 99.9 ~ 104.4 ~ 108.7  
 Nonpara: 100.0 ~ 104.6 ~ 108.3  
 Pow=1.185 TPos=95.207  
 Kurt=2.479 Skew=-0.143

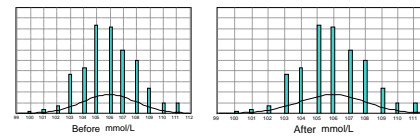

Cl(mmol/L) F n=221  
 Para: 101.9 ~ 105.9 ~ 110.0  
 Nonpara: 101.8 ~ 106.0 ~ 110.2  
 Pow=0.964 TPos=98.64  
 Kurt=2.523 Skew=0.019

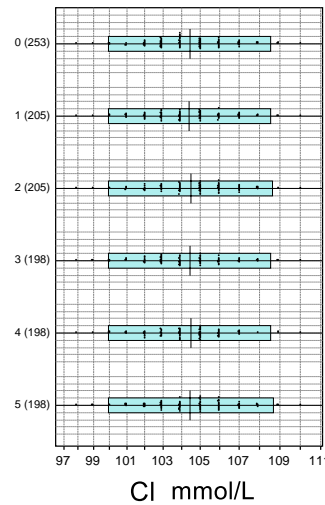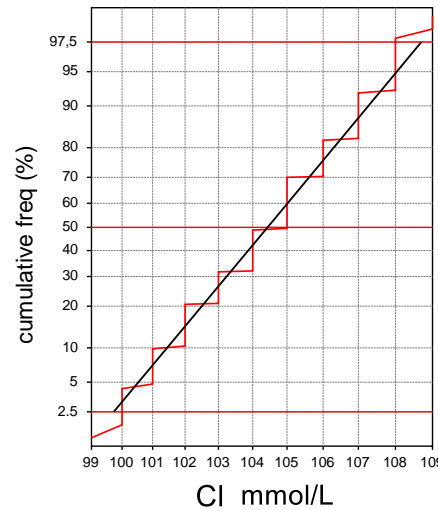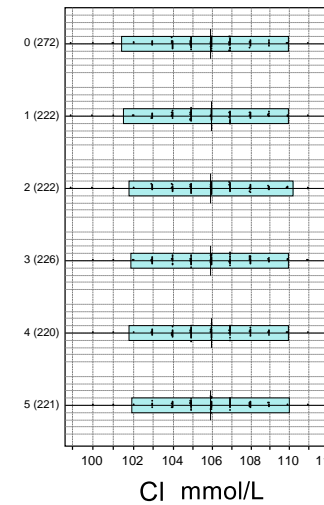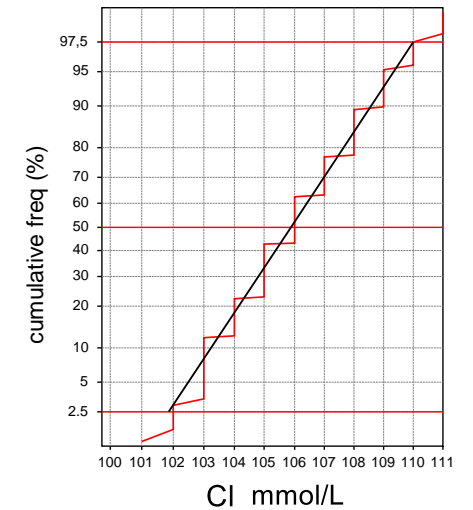

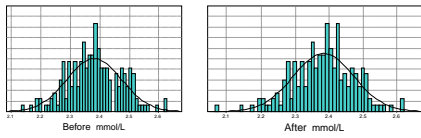

Ca(mmol/L) M n=198  
 Para: 2.206 ~ 2.380 ~ 2.563  
 Nonpara: 2.183 ~ 2.383 ~ 2.550  
 Pow=0.966 TPos=2.05  
 Kurt=2.788 Skew=-0.096

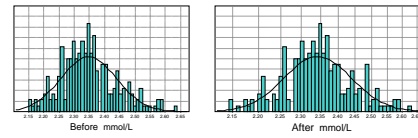

Ca(mmol/L) F n=223  
 Para: 2.186 ~ 2.343 ~ 2.543  
 Nonpara: 2.182 ~ 2.343 ~ 2.560  
 Pow=0.688 TPos=2.085  
 Kurt=2.872 Skew=-0.018

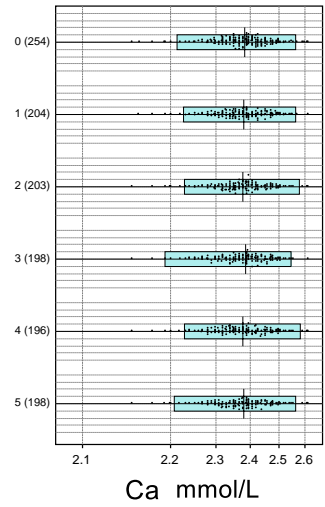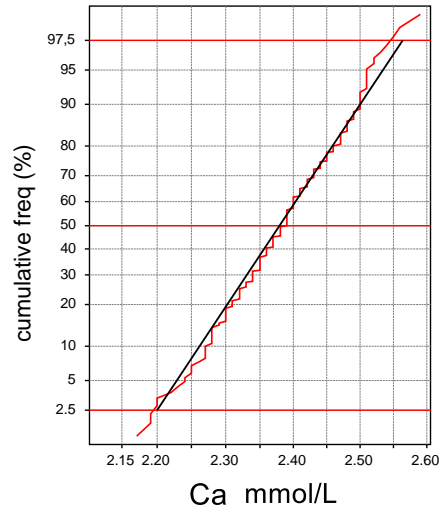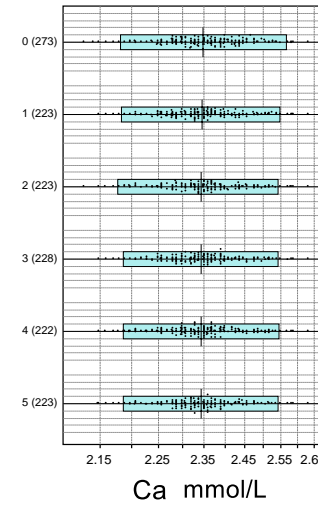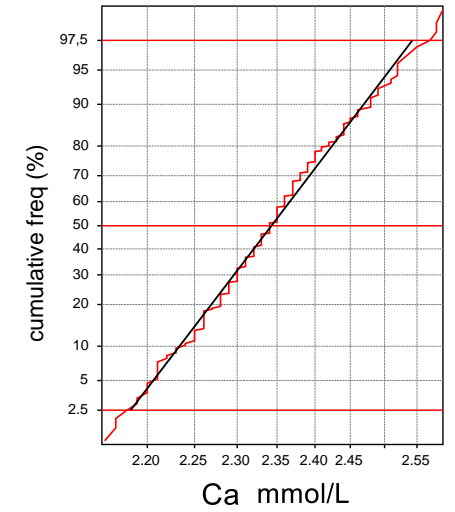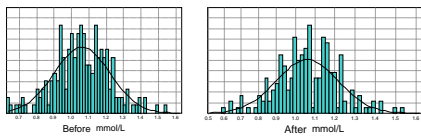

IP(mmol/L) M n=198  
 Para: 0.738 ~ 1.061 ~ 1.366  
 Nonpara: 0.709 ~ 1.057 ~ 1.390  
 Pow=1.122 TPos=0.479  
 Kurt=3.009 Skew=0.032

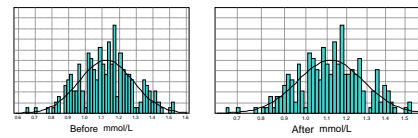

IP(mmol/L) F n=223  
 Para: 0.825 ~ 1.120 ~ 1.449  
 Nonpara: 0.831 ~ 1.126 ~ 1.432  
 Pow=0.866 TPos=0.626  
 Kurt=2.598 Skew=-0.02

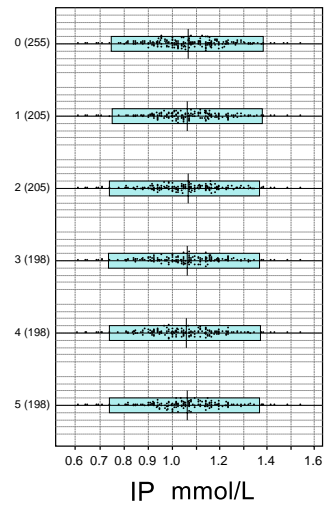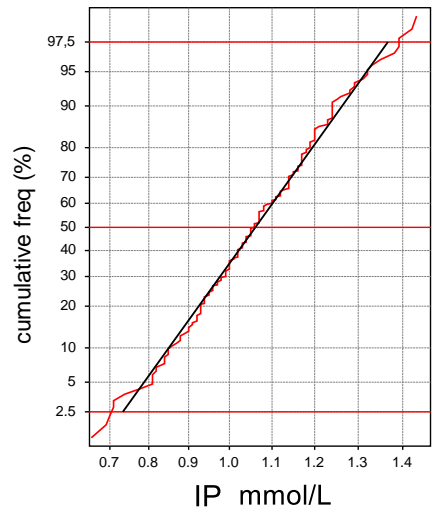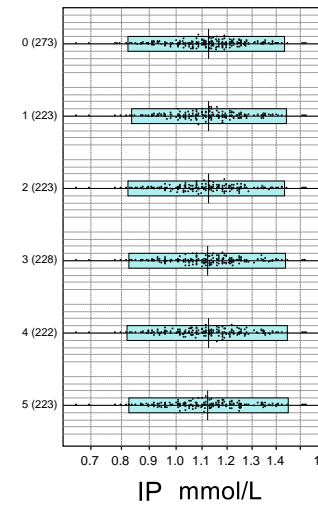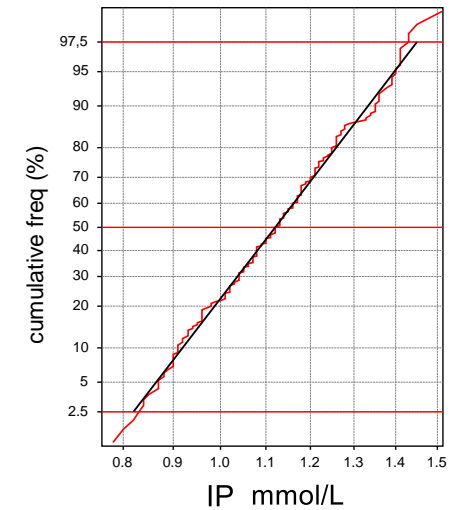

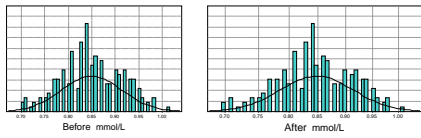

Mg(mmol/L) M n=198  
 Para: 0.733 ~ 0.850 ~ 0.981  
 Nonpara: 0.725 ~ 0.849 ~ 0.971  
 Pow=0.841 TPos=0.643  
 Kurt=2.534 Skew=-0.114

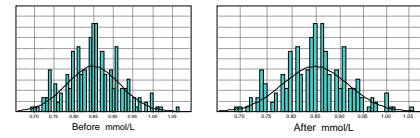

Mg(mmol/L) F n=223  
 Para: 0.723 ~ 0.848 ~ 0.984  
 Nonpara: 0.726 ~ 0.850 ~ 0.995  
 Pow=0.892 TPos=0.63  
 Kurt=2.726 Skew=-0.051

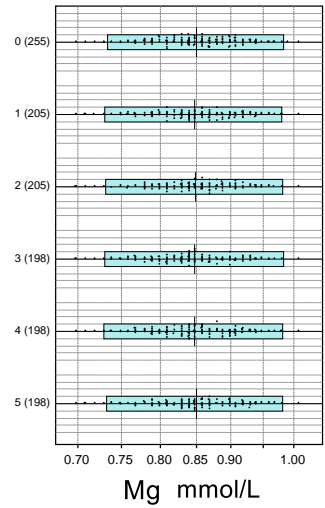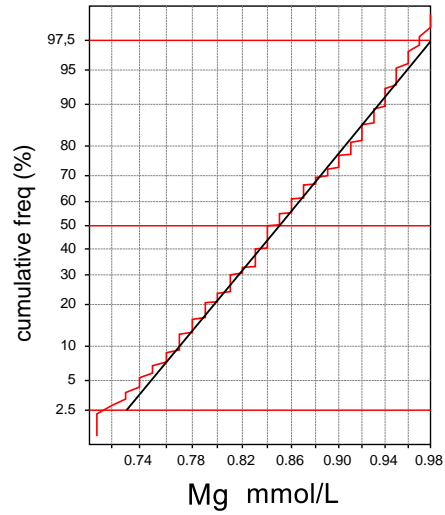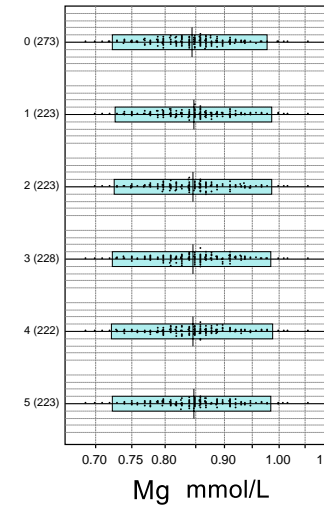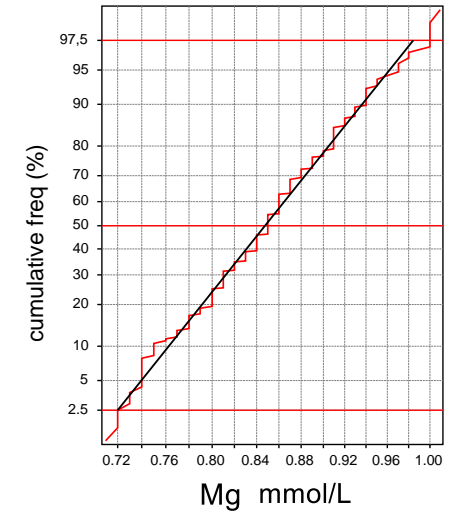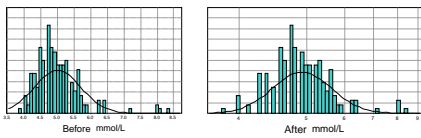

Glu(mmol/L) M n=193  
 Para: 4.06 ~ 4.89 ~ 6.52  
 Nonpara: 4.03 ~ 4.89 ~ 7.76  
 Pow=0.395 TPos=3.729  
 Kurt=2.811 Skew=-0.037

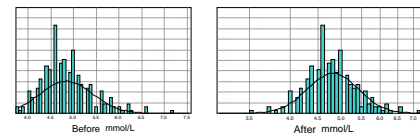

Glu(mmol/L) F n=228  
 Para: 3.89 ~ 4.80 ~ 6.09  
 Nonpara: 3.86 ~ 4.80 ~ 7.91  
 Pow=0.575 TPos=3.343  
 Kurt=2.826 Skew=0.127

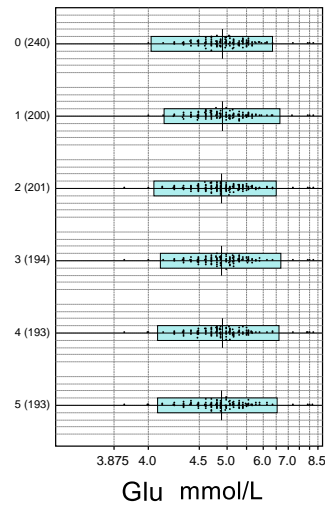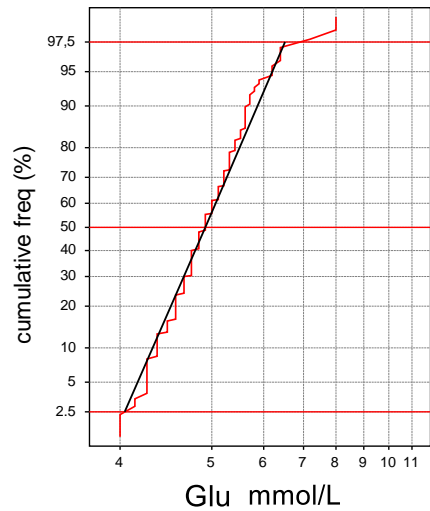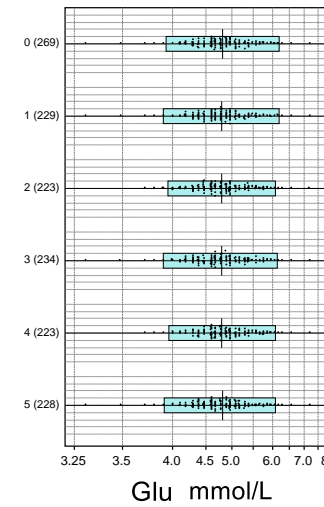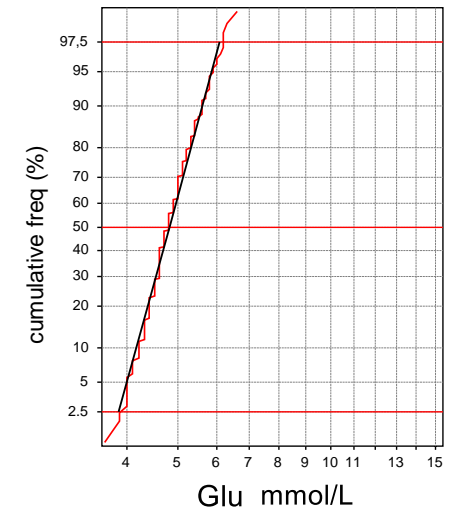

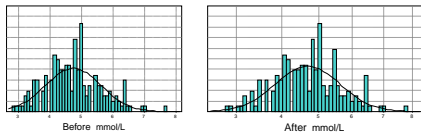

TC(mmol/L) M n=198  
 Para: 3.18 ~ 4.67 ~ 6.59  
 Nonpara: 3.18 ~ 4.71 ~ 6.48  
 Pow=0.72 TPos=2.375  
 Kurt=2.653 Skew=-0.066

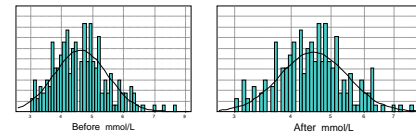

TC(mmol/L) F n=223  
 Para: 3.19 ~ 4.52 ~ 6.55  
 Nonpara: 3.12 ~ 4.57 ~ 6.35  
 Pow=0.591 TPos=2.602  
 Kurt=2.734 Skew=-0.19

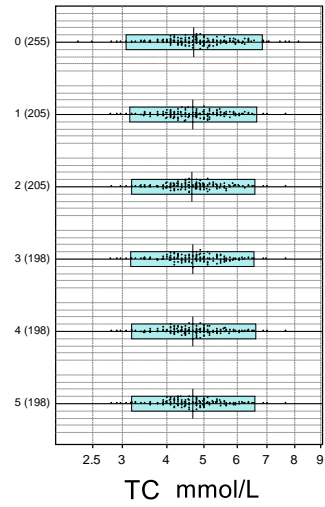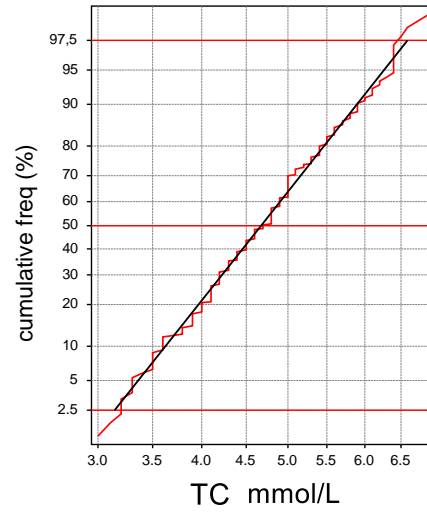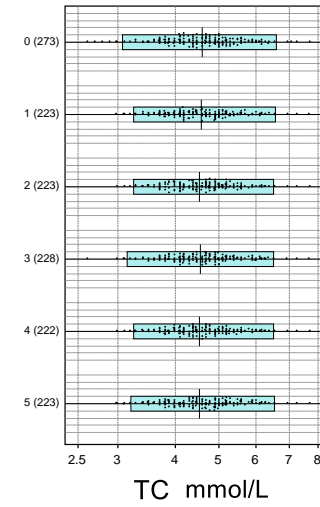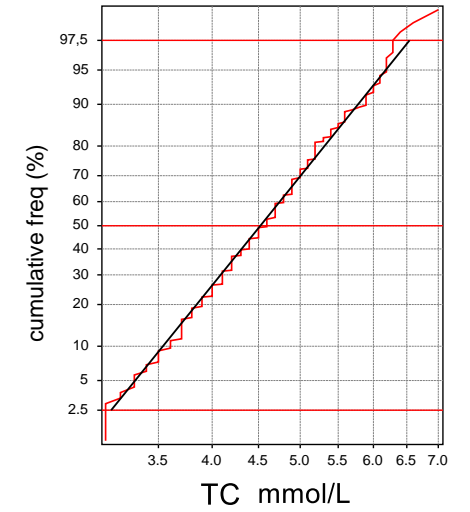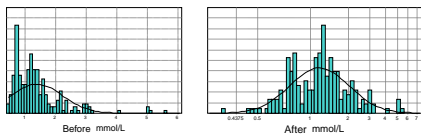

TG(mmol/L) M n=204  
 Para: 0.521 ~ 1.150 ~ 3.441  
 Nonpara: 0.513 ~ 1.202 ~ 3.685  
 Pow=0.181 TPos=0.394  
 Kurt=2.91 Skew=-0.239

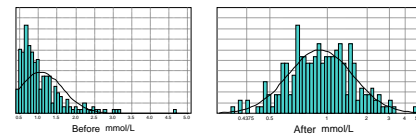

TG(mmol/L) F n=228  
 Para: 0.462 ~ 0.887 ~ 2.708  
 Nonpara: 0.453 ~ 0.892 ~ 2.604  
 Pow=0.141 TPos=0.389  
 Kurt=2.707 Skew=-0.044

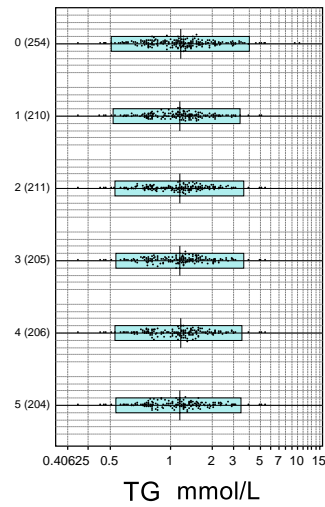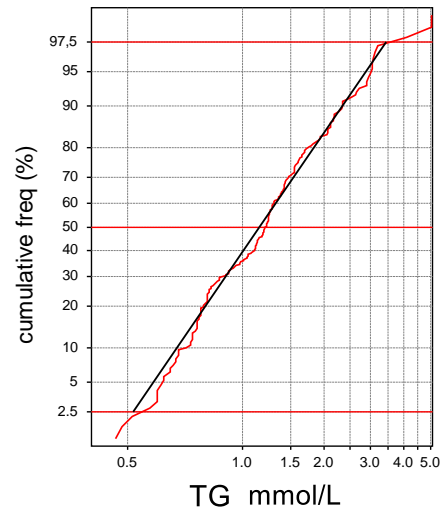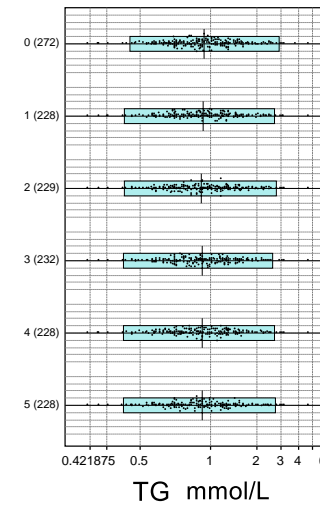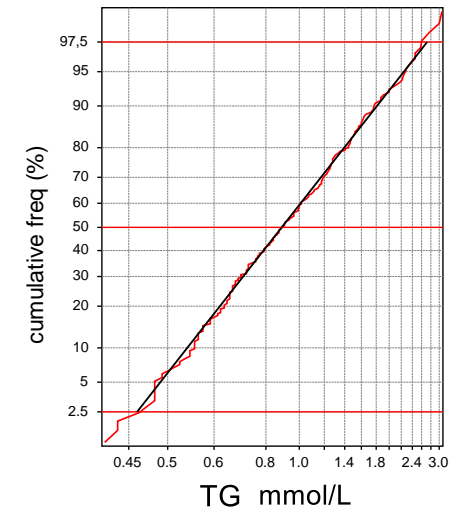



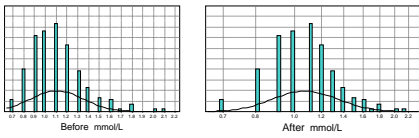

HDL-C(mmol/L) M n=198  
 Para: 0.748 ~ 1.067 ~ 1.667  
 Nonpara: 0.748 ~ 1.090 ~ 1.717  
 Pow=0.427 TPos=0.645  
 Kurt=2.912 Skew=-0.217

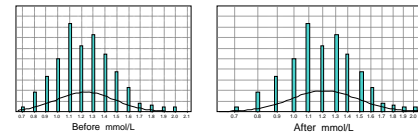

HDL-C(mmol/L) F n=222  
 Para: 0.806 ~ 1.214 ~ 1.772  
 Nonpara: 0.796 ~ 1.210 ~ 1.821  
 Pow=0.647 TPos=0.624  
 Kurt=2.786 Skew=0.092

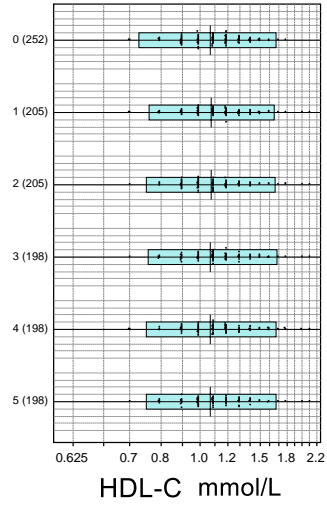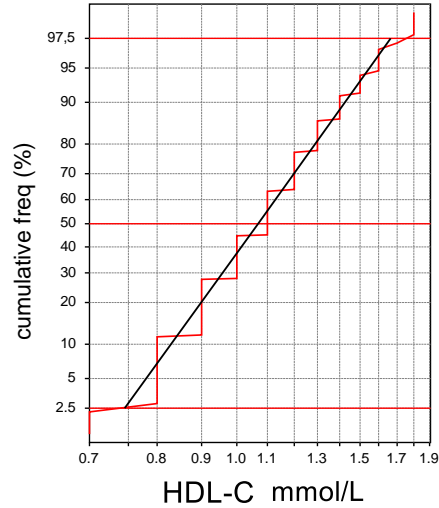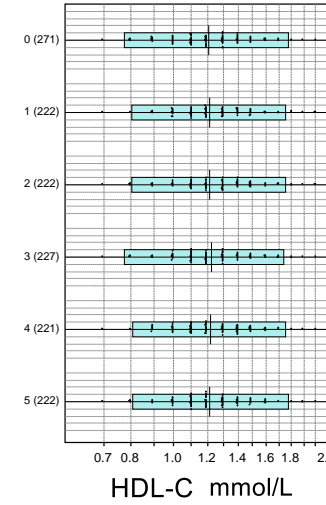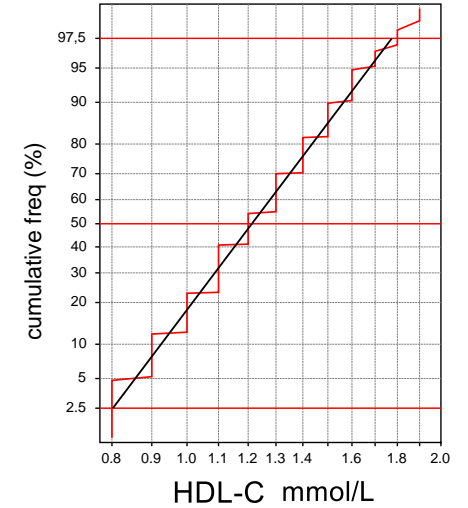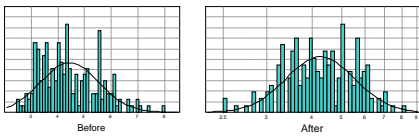

HDLrat M n=197  
 Para: 2.78 ~ 4.24 ~ 7.26  
 Nonpara: 2.72 ~ 4.26 ~ 6.78  
 Pow=0.355 TPos=2.29  
 Kurt=2.586 Skew=-0.165

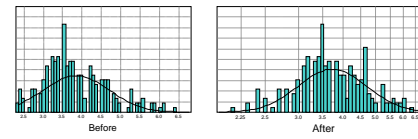

HDLrat F n=223  
 Para: 2.51 ~ 3.74 ~ 5.83  
 Nonpara: 2.43 ~ 3.69 ~ 5.85  
 Pow=0.445 TPos=2.006  
 Kurt=2.739 Skew=0.126

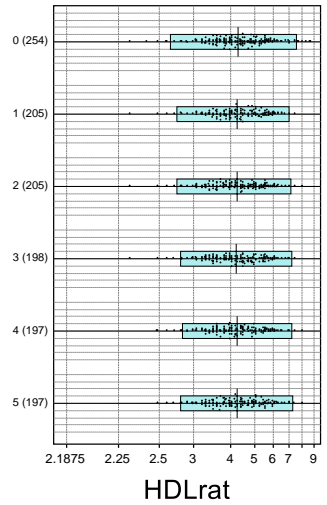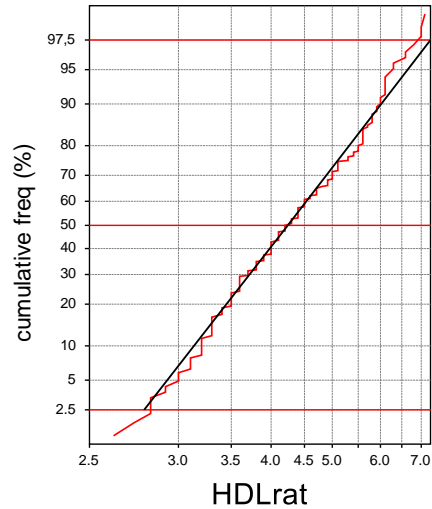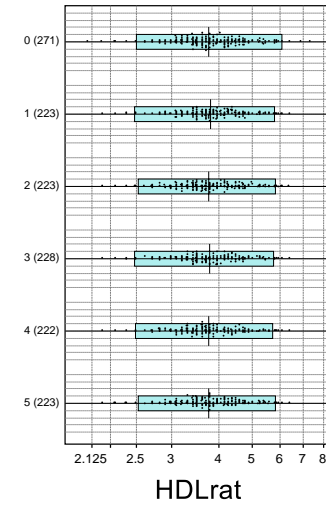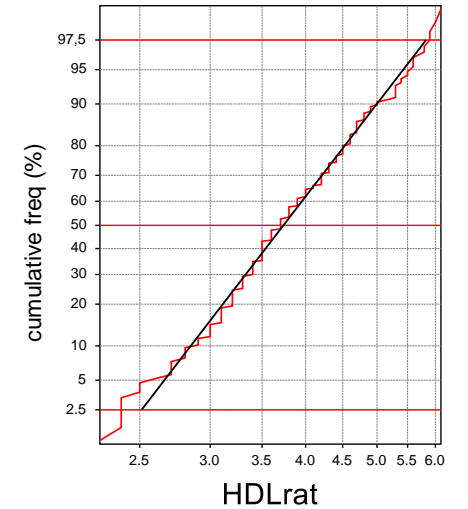

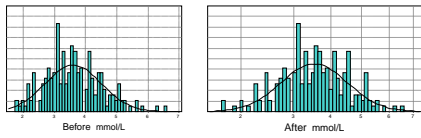

nonHDL(mmol/L) M n=202  
 Para: 2.122 ~ 3.523 ~ 5.650  
 Nonpara: 2.082 ~ 3.568 ~ 5.491  
 Pow=0.56 TPos=1.553  
 Kurt=2.681 Skew=-0.117

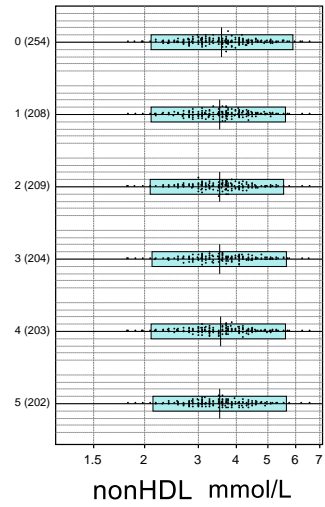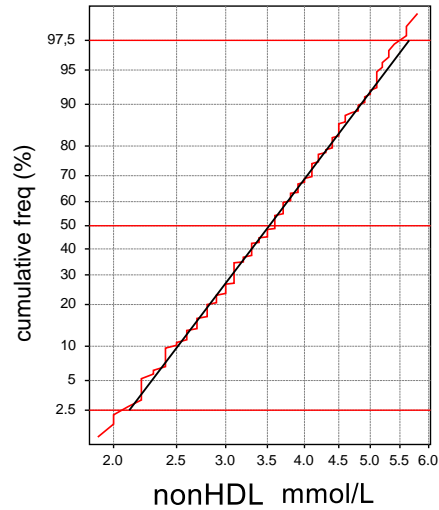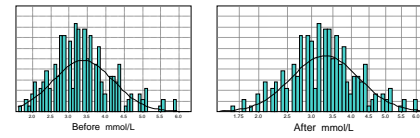

nonHDL(mmol/L) F n=225  
 Para: 2.029 ~ 3.316 ~ 5.159  
 Nonpara: 2.031 ~ 3.324 ~ 5.153  
 Pow=0.605 TPos=1.47  
 Kurt=2.762 Skew=-0.07

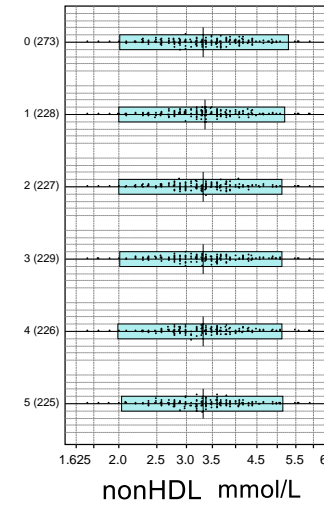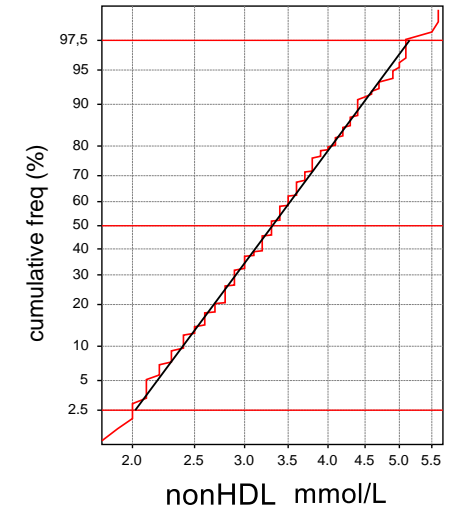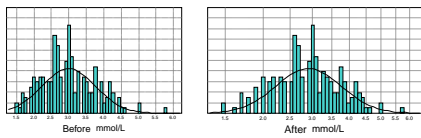

LDL-C(mmol/L) M n=198  
 Para: 1.734 ~ 2.919 ~ 4.707  
 Nonpara: 1.708 ~ 2.950 ~ 4.483  
 Pow=0.581 TPos=1.31  
 Kurt=2.613 Skew=-0.084

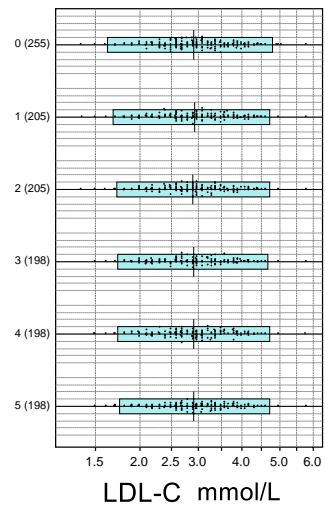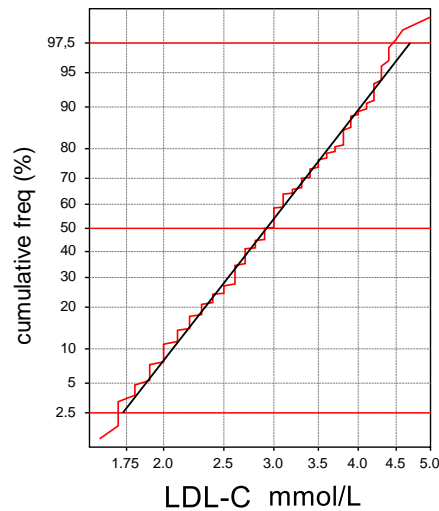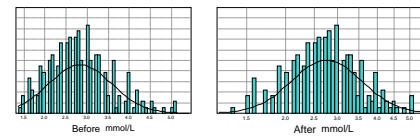

LDL-C(mmol/L) F n=223  
 Para: 1.625 ~ 2.750 ~ 4.549  
 Nonpara: 1.585 ~ 2.780 ~ 4.551  
 Pow=0.532 TPos=1.217  
 Kurt=2.806 Skew=-0.087

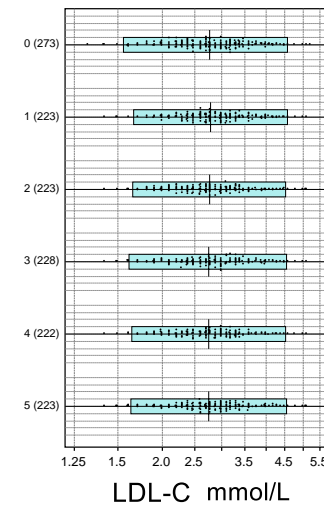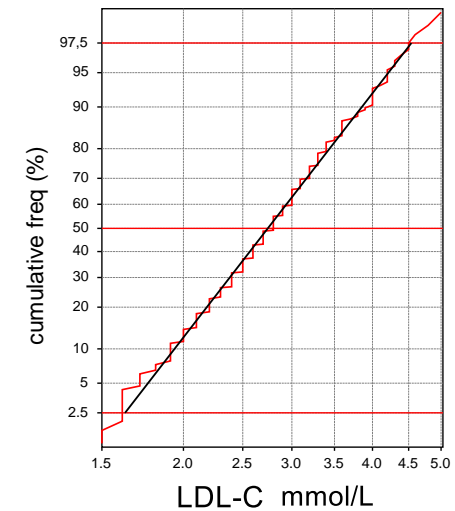

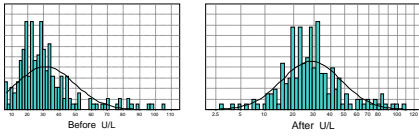

Lip(U/L) M n=195  
 Para: 7.57 ~ 28.49 ~ 72.33  
 Nonpara: 7.53 ~ 27.70 ~ 97.21  
 Pow=0.416 TPos=1.988  
 Kurt=3.039 Skew=0.159

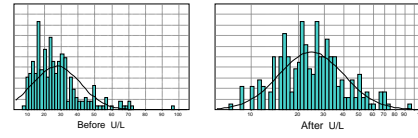

Lip(U/L) F n=222  
 Para: 9.63 ~ 24.24 ~ 60.48  
 Nonpara: 9.65 ~ 24.30 ~ 65.26  
 Pow=0.283 TPos=5.531  
 Kurt=2.797 Skew=0.002

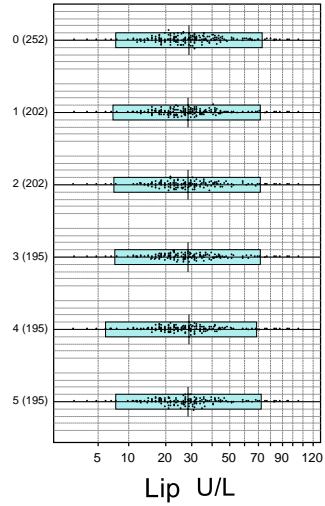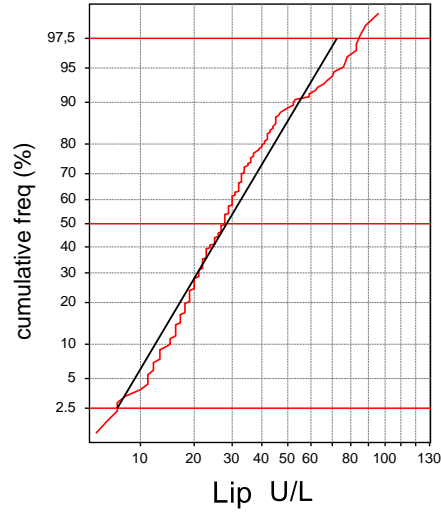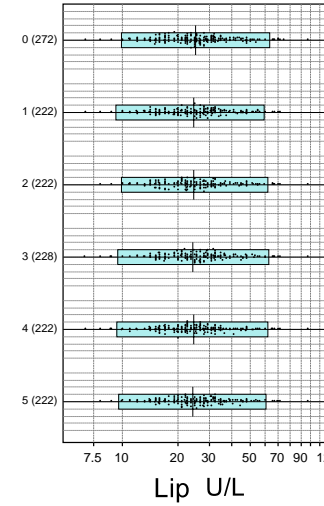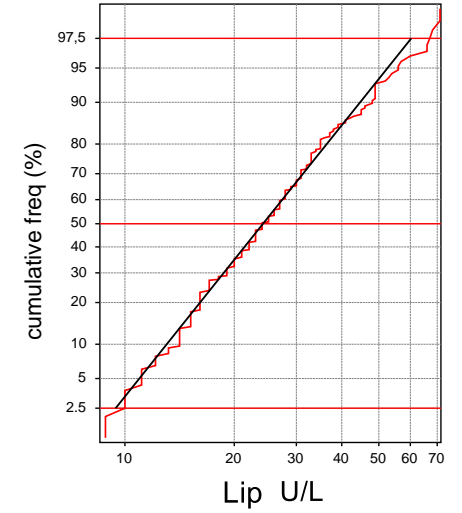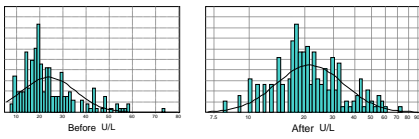

ALT(U/L) M n=202  
 Para: 9.59 ~ 21.57 ~ 53.77  
 Nonpara: 9.52 ~ 20.90 ~ 56.15  
 Pow=0.234 TPos=6.165  
 Kurt=2.755 Skew=0.266

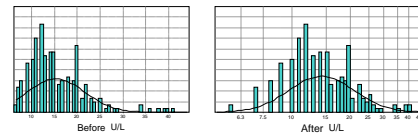

ALT(U/L) F n=233  
 Para: 7.20 ~ 14.14 ~ 30.73  
 Nonpara: 7.18 ~ 14.00 ~ 34.93  
 Pow=0.279 TPos=4.991  
 Kurt=2.89 Skew=0.192

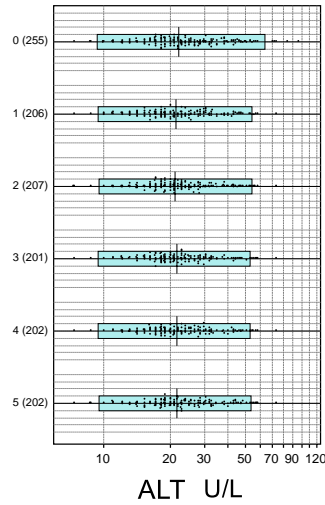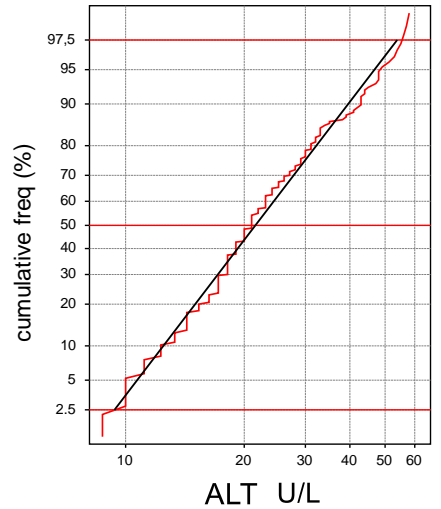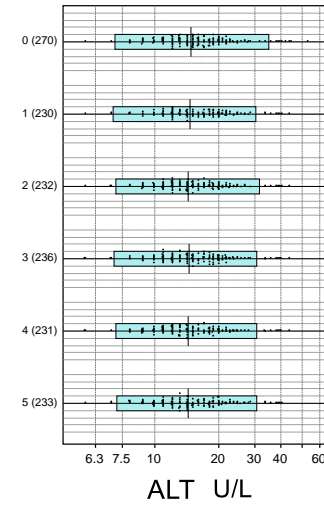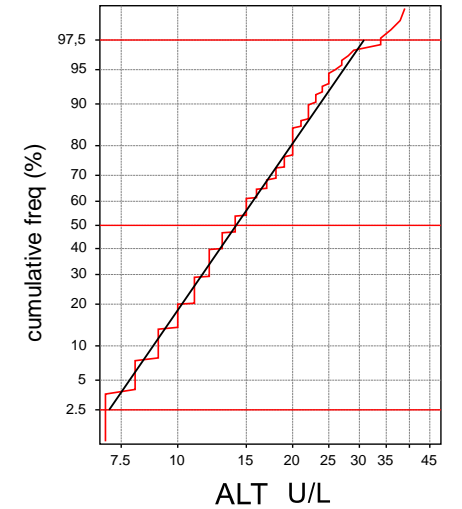

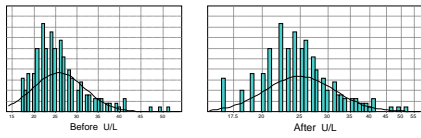

AST(U/L) M n=206  
 Para: 17.39 ~ 24.76 ~ 39.82  
 Nonpara: 17.09 ~ 24.60 ~ 41.16  
 Pow=0.361 TPos=14.75  
 Kurt=2.841 Skew=0.077

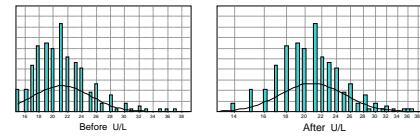

AST(U/L) F n=231  
 Para: 14.89 ~ 20.75 ~ 29.99  
 Nonpara: 14.87 ~ 20.80 ~ 32.28  
 Pow=0.527 TPos=12.394  
 Kurt=2.851 Skew=-0.003

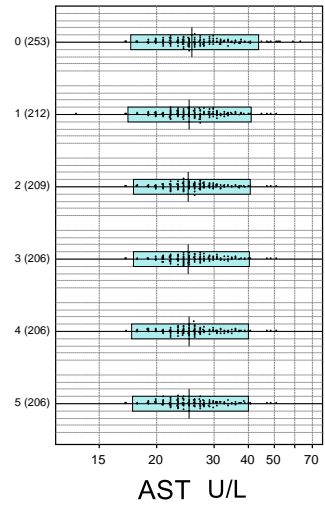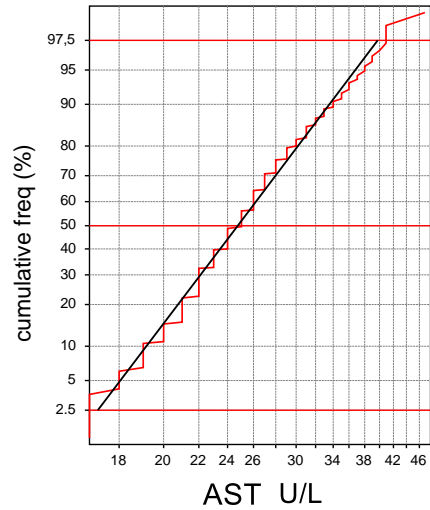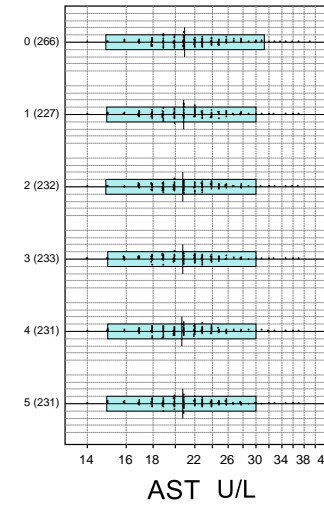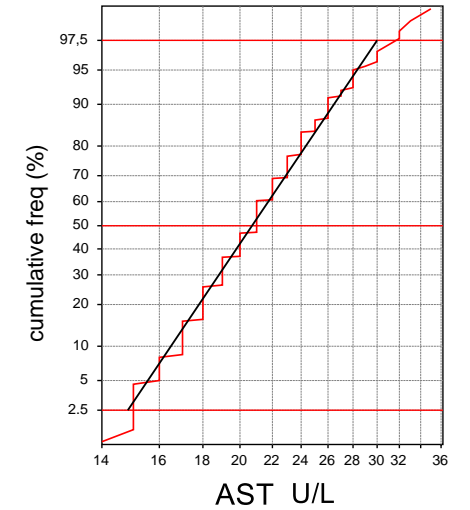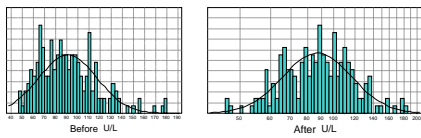

ALP(U/L) M n=198  
 Para: 52.9 ~ 86.9 ~ 154.7  
 Nonpara: 53.2 ~ 87.9 ~ 156.5  
 Pow=0.41 TPos=43.238  
 Kurt=2.828 Skew=-0.074

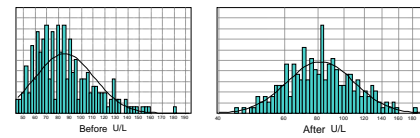

ALP(U/L) F n=221  
 Para: 47.9 ~ 80.7 ~ 145.7  
 Nonpara: 46.9 ~ 81.0 ~ 144.0  
 Pow=0.382 TPos=36.188  
 Kurt=2.629 Skew=-0.003

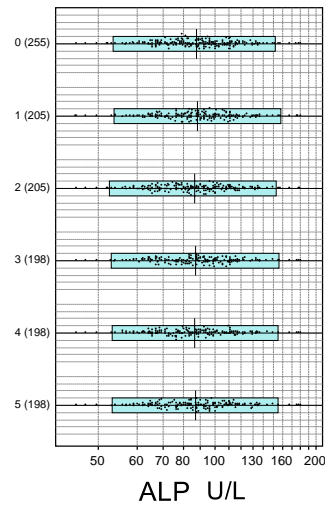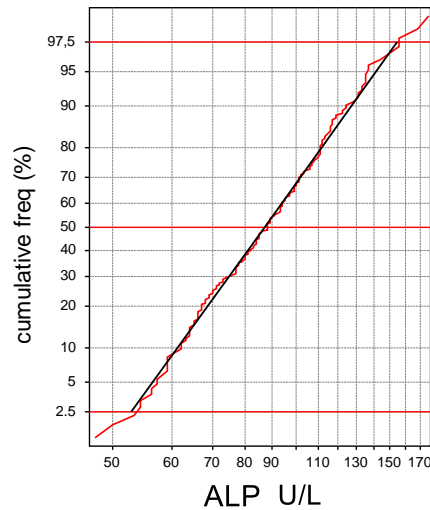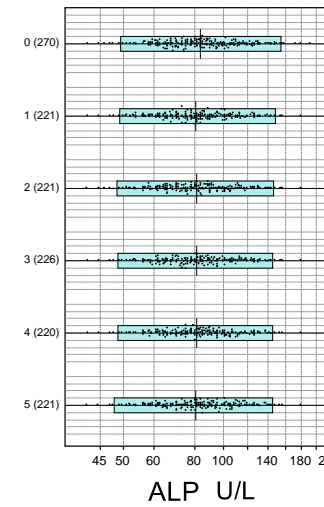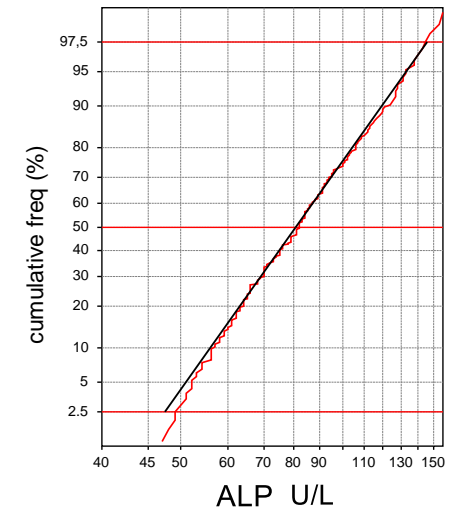

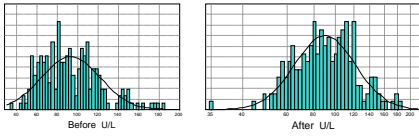

AMY(U/L) M n=197  
 Para: 49.1 ~ 89.7 ~ 160.0  
 Nonpara: 50.7 ~ 89.8 ~ 165.0  
 Pow=0.483 TPos=34.86  
 Kurt=2.563 Skew=0.051

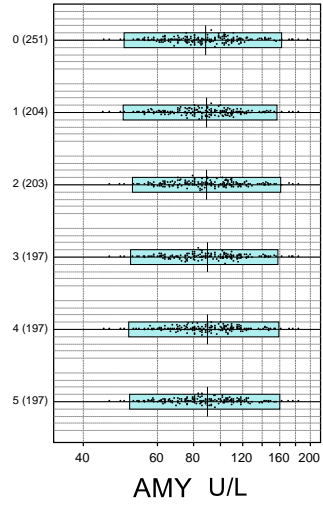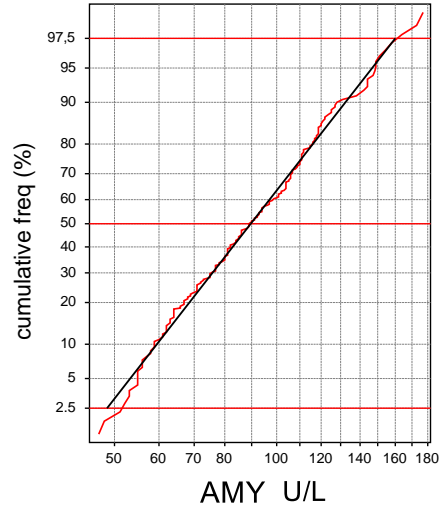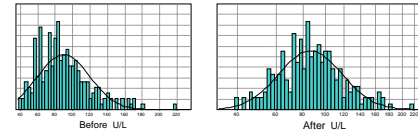

AMY(U/L) F n=222  
 Para: 44.8 ~ 85.5 ~ 155.5  
 Nonpara: 44.7 ~ 84.9 ~ 163.1  
 Pow=0.468 TPos=28.504  
 Kurt=2.791 Skew=0.104

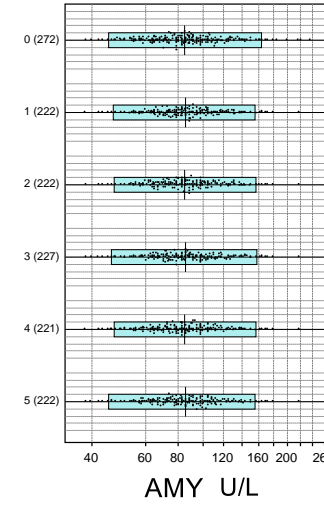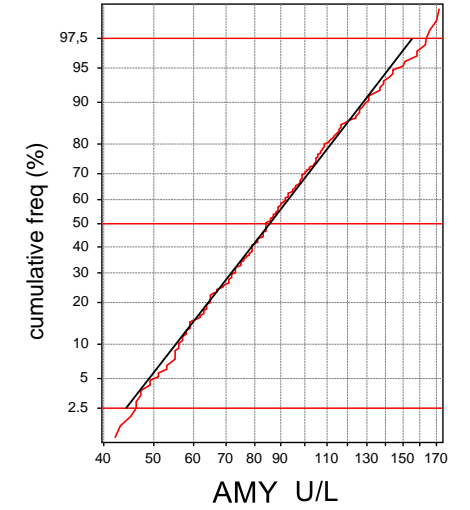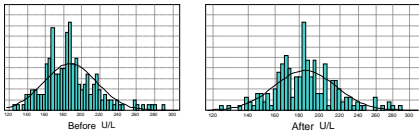

LDH(U/L) M n=204  
 Para: 137.7 ~ 185.4 ~ 248.1  
 Nonpara: 137.6 ~ 184.7 ~ 260.7  
 Pow=0.685 TPos=113.806  
 Kurt=2.935 Skew=0.081

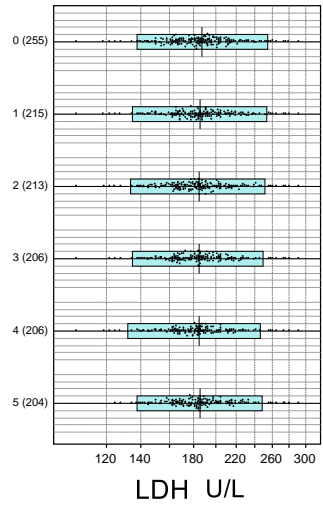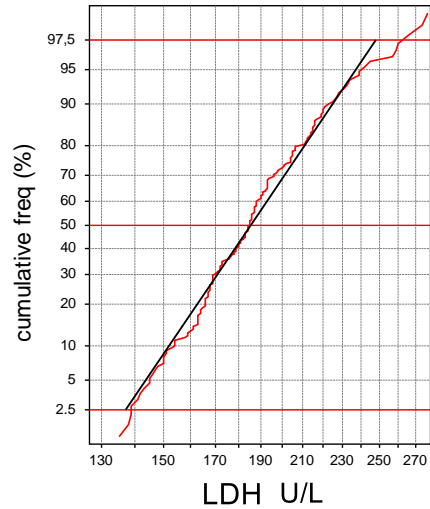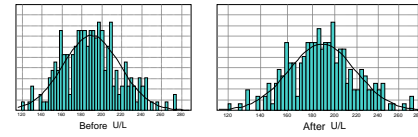

LDH(U/L) F n=228  
 Para: 138.8 ~ 188.5 ~ 247.5  
 Nonpara: 139.4 ~ 188.9 ~ 254.7  
 Pow=0.799 TPos=115.016  
 Kurt=2.653 Skew=0.031

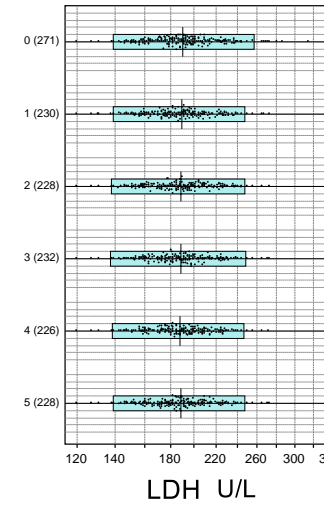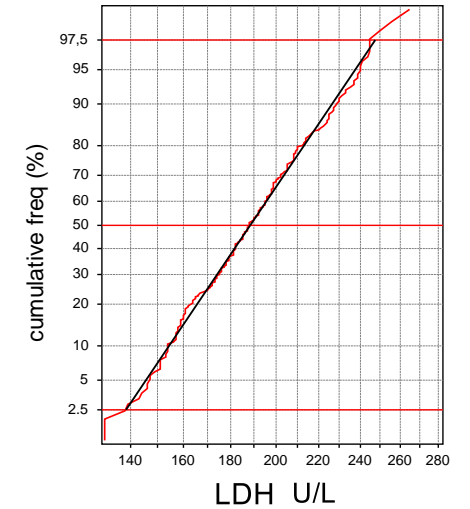

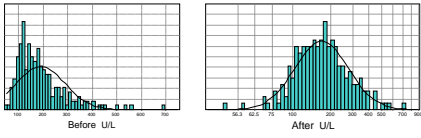

CK(U/L) M n=204  
 Para: 74.0 ~ 168.6 ~ 426.0  
 Nonpara: 73.6 ~ 167.5 ~ 460.7  
 Pow=0.274 TPos=53.065  
 Kurt=2.748 Skew=0.081

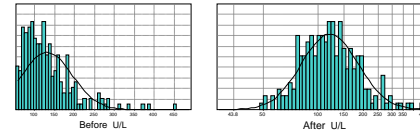

CK(U/L) F n=223  
 Para: 55.1 ~ 118.8 ~ 274.6  
 Nonpara: 55.7 ~ 118.0 ~ 336.8  
 Pow=0.361 TPos=43.399  
 Kurt=2.829 Skew=0.118

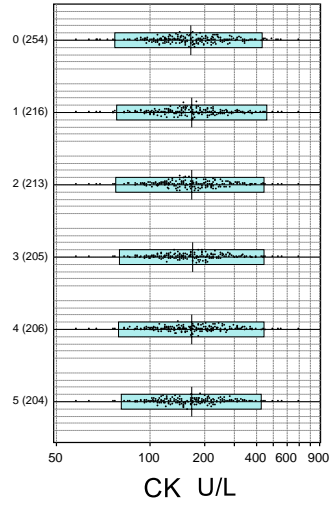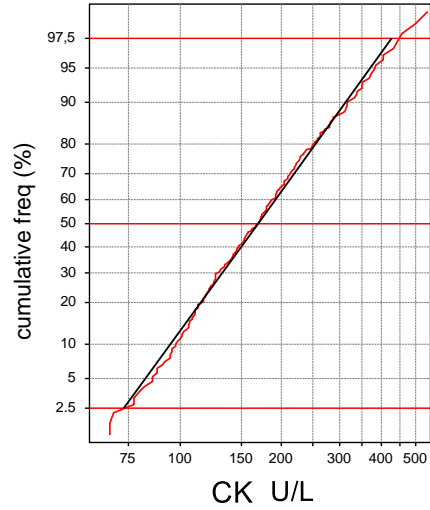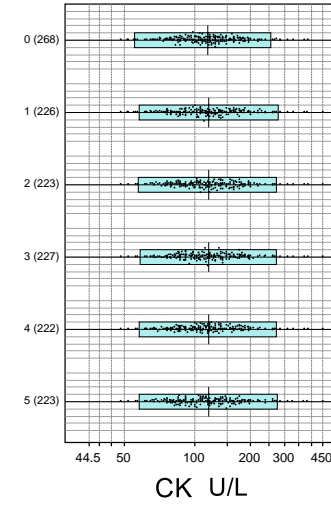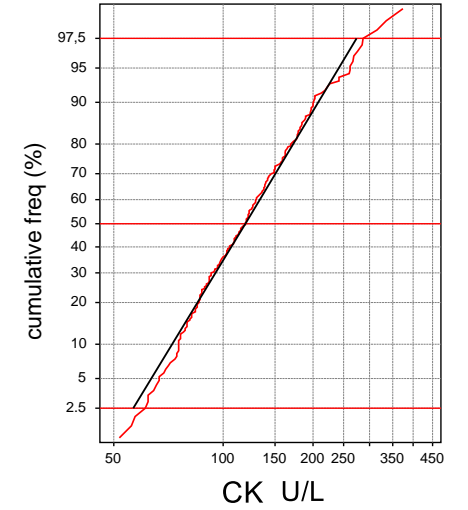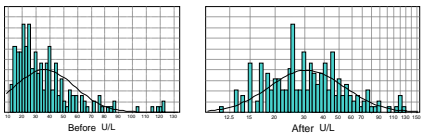

GGT(U/L) M n=200  
 Para: 12.87 ~ 30.65 ~ 91.30  
 Nonpara: 13.57 ~ 30.40 ~ 103.46  
 Pow=0.209 TPos=9.62  
 Kurt=2.688 Skew=0.096

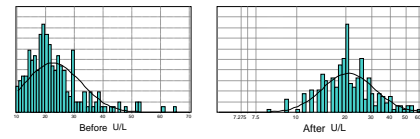

GGT(U/L) F n=227  
 Para: 10.14 ~ 21.08 ~ 47.20  
 Nonpara: 9.81 ~ 20.50 ~ 52.88  
 Pow=0.316 TPos=7.203  
 Kurt=2.906 Skew=0.173

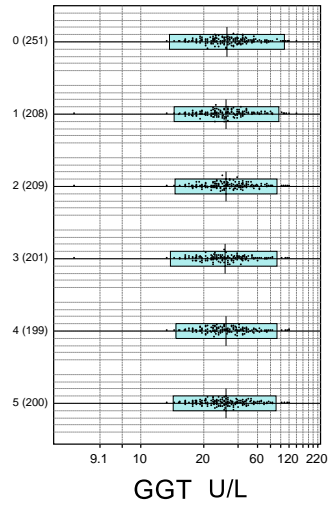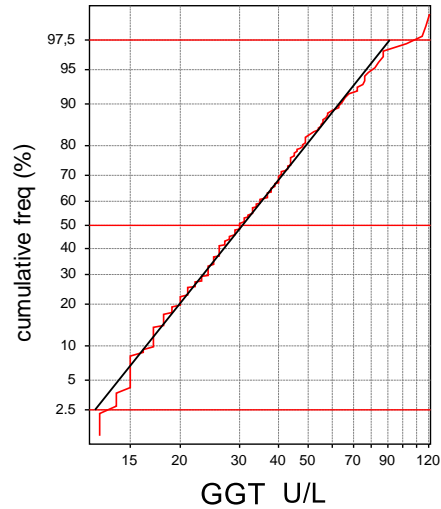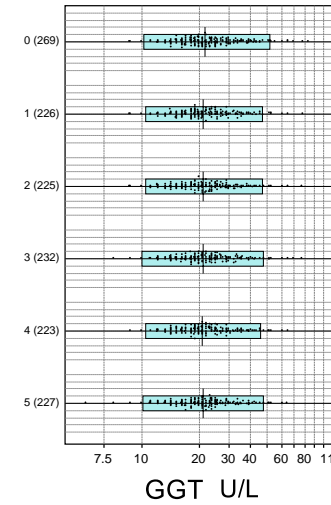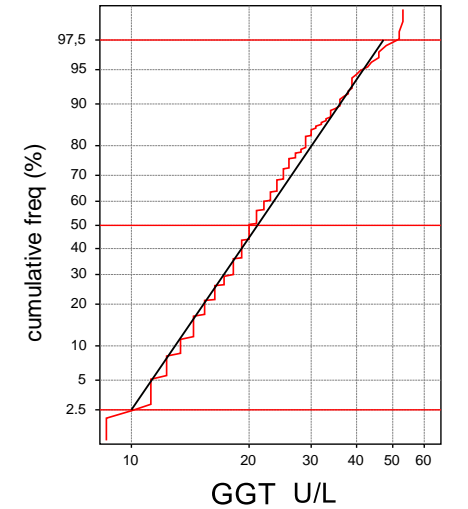

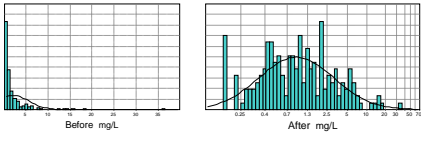

CRP(mg/L) M n=203  
 Para: 0.20 ~ 0.92 ~ 11.94  
 Nonpara: 0.20 ~ 0.92 ~ 11.64  
 Pow=-0.011 TPos=0.139  
 Kurt=2.701 Skew=-0.085

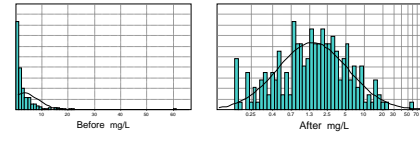

CRP(mg/L) F n=226  
 Para: 0.22 ~ 1.48 ~ 20.11  
 Nonpara: 0.21 ~ 1.60 ~ 16.47  
 Pow=0.031 TPos=0.153  
 Kurt=2.603 Skew=-0.208

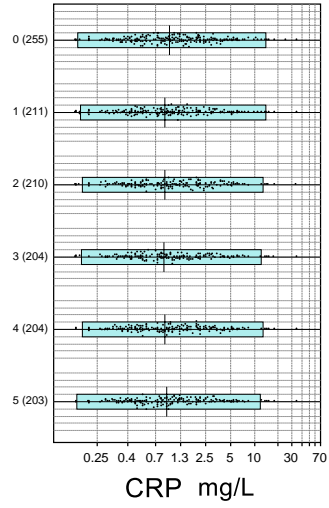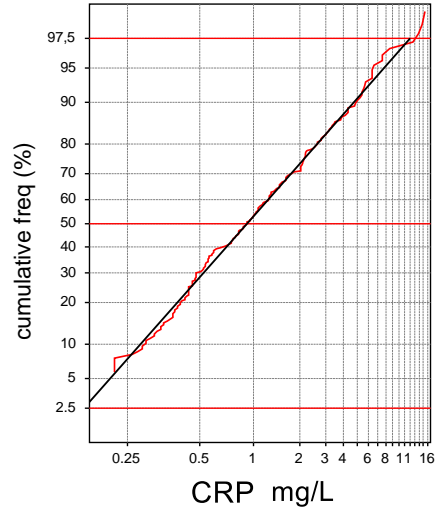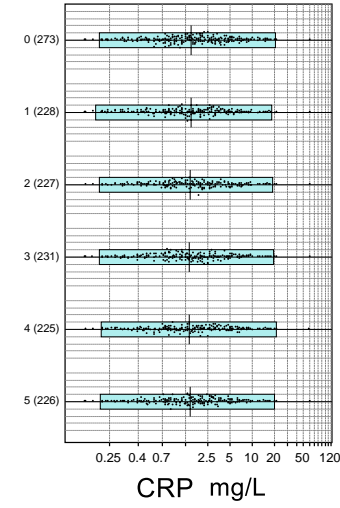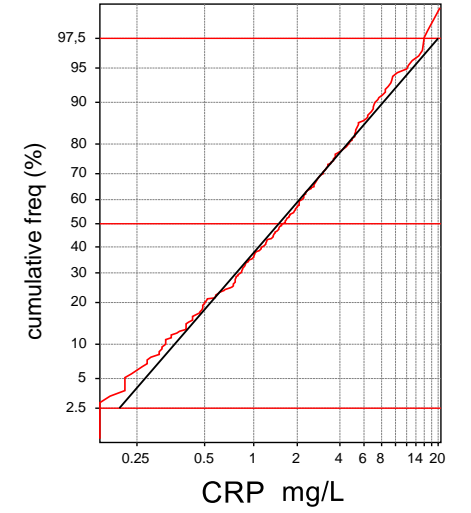

Supplement: pone.0235234.s003.pdf [file pone.0235234.s003.pdf]
