# Supplementary material for: Determination of reference intervals for common chemistry and immunoassay tests for Kenyan adults based on an internationally harmonized protocol and up-to-date statistical methods
Source: PubMed Central journal article supplement (PMC7347104; doi:10.1371/journal.pone.0235234), 2020-07-09

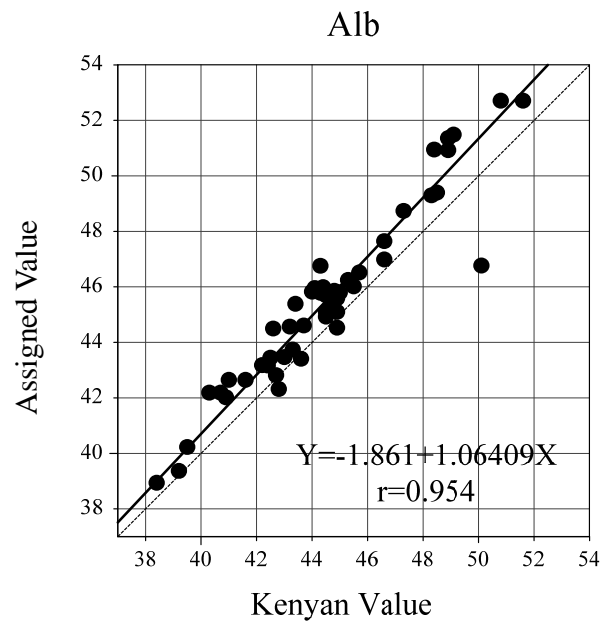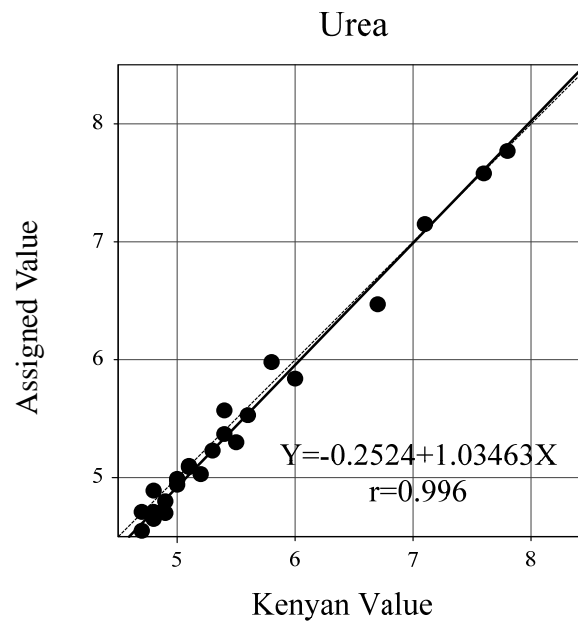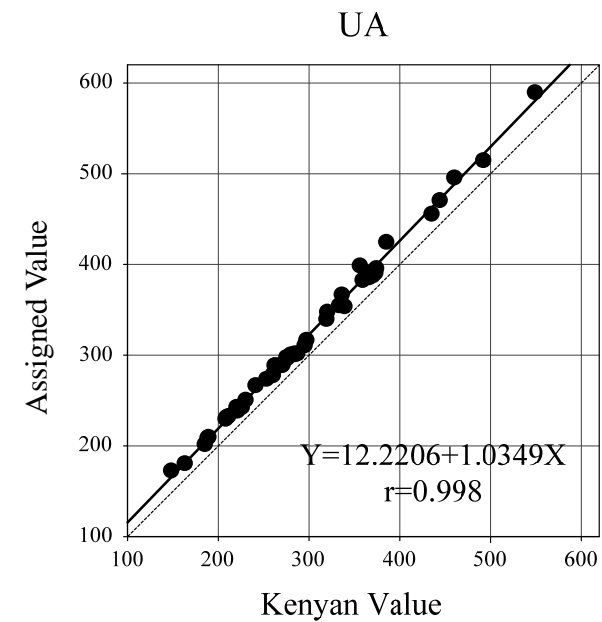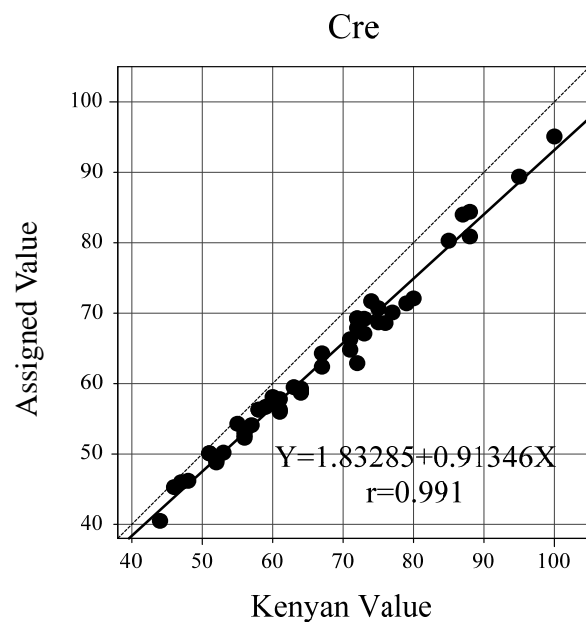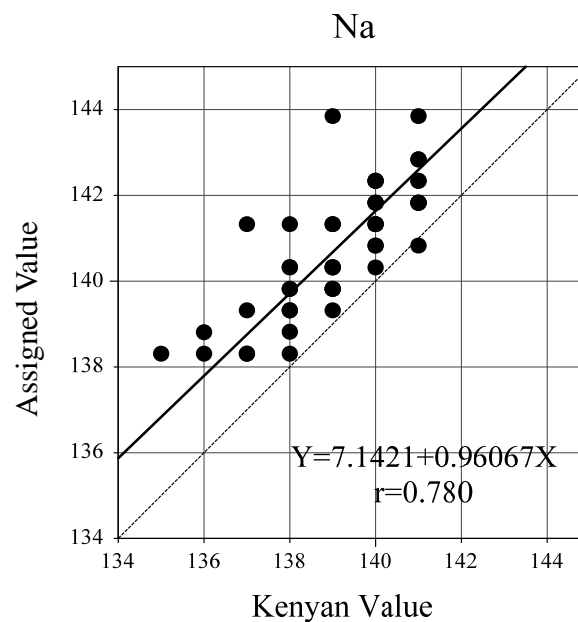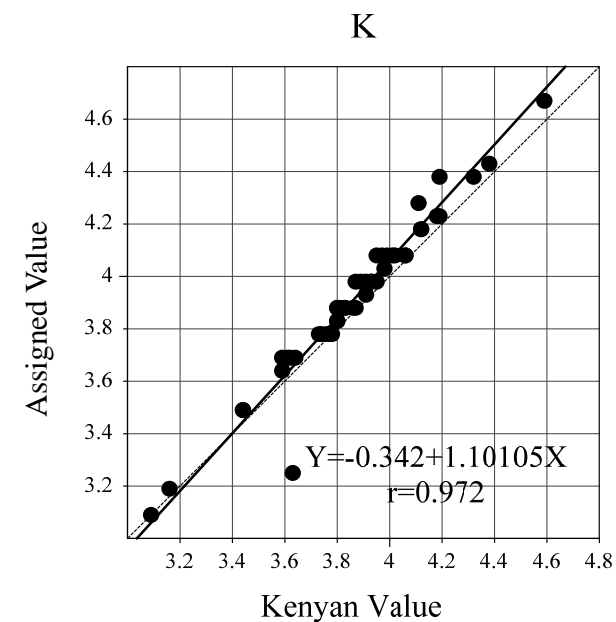

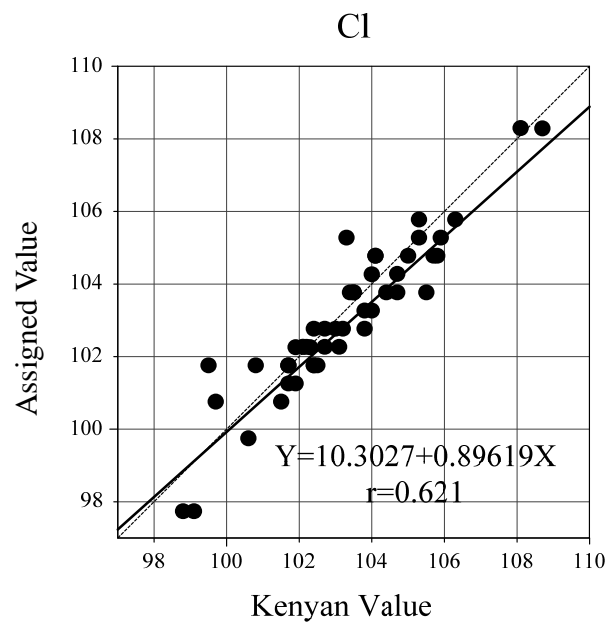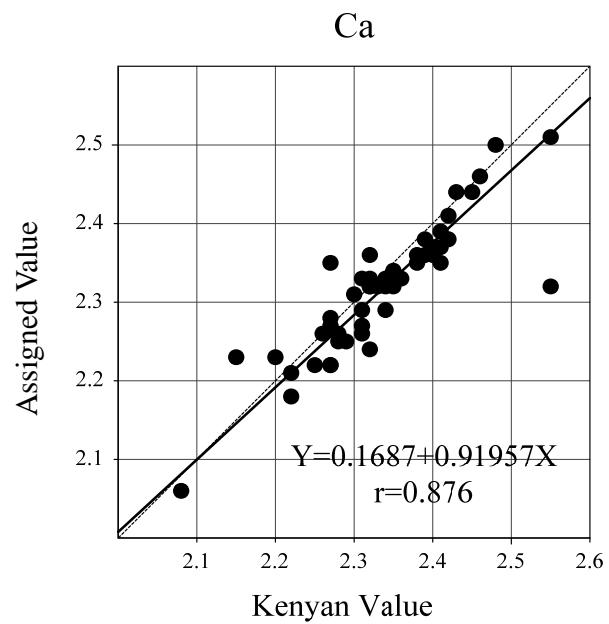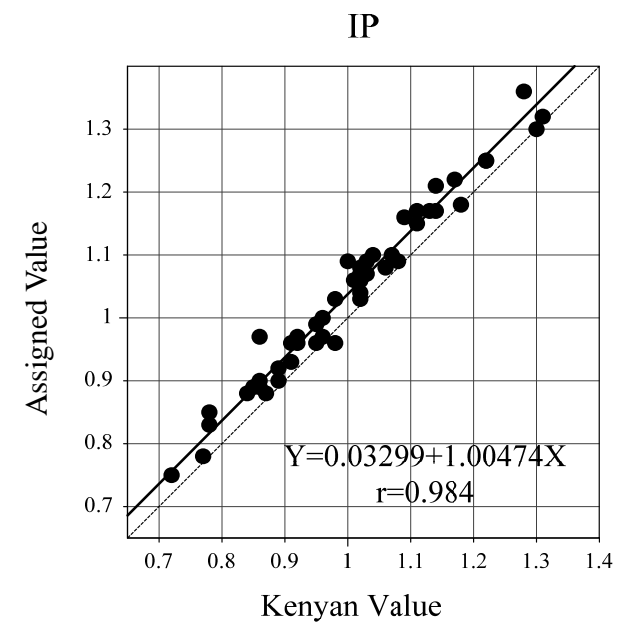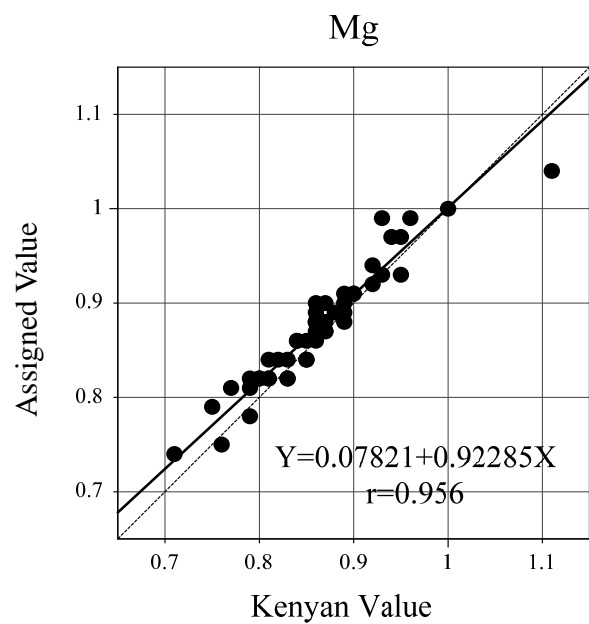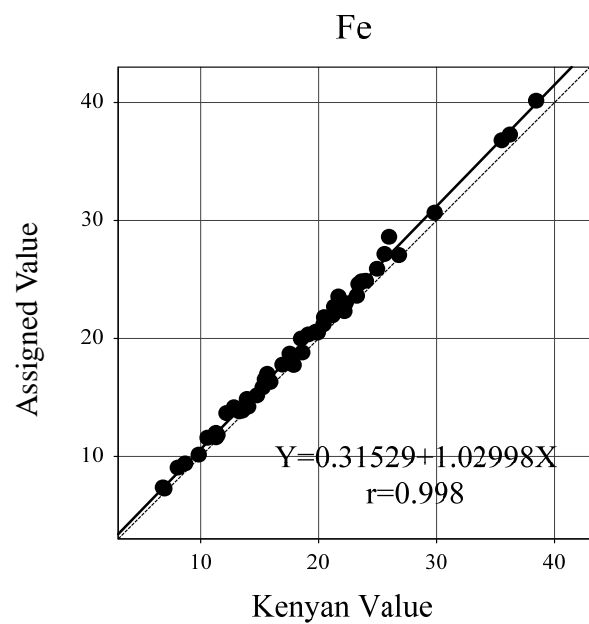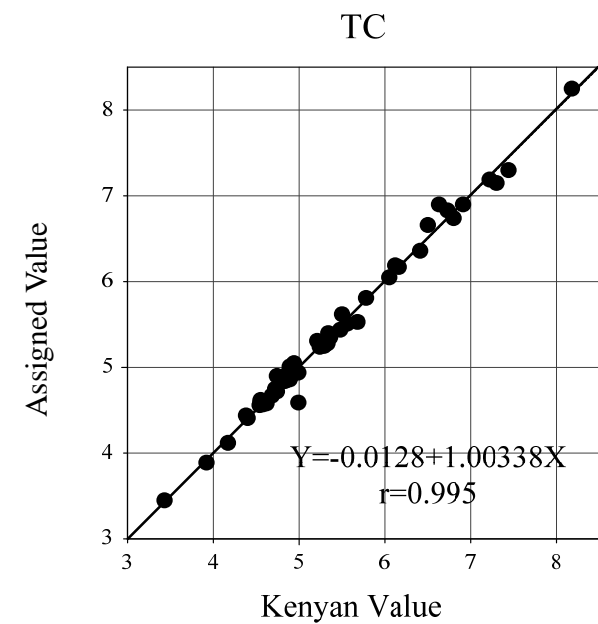

TG

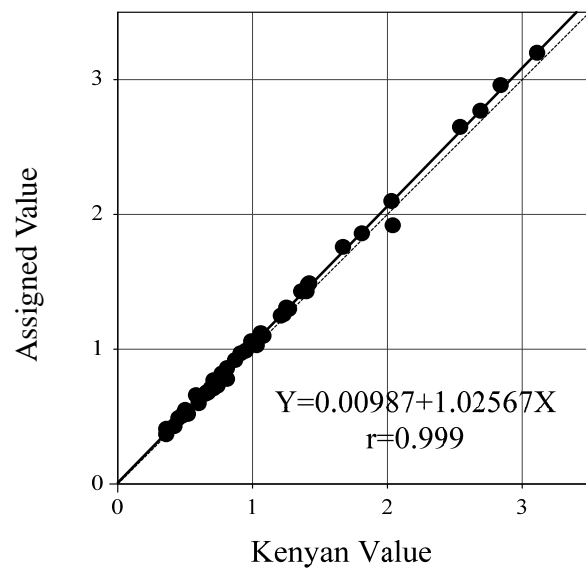

HDL-C

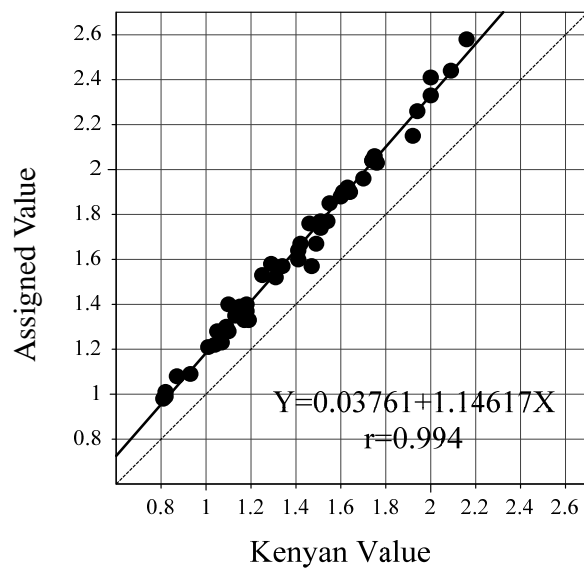

LDL-C

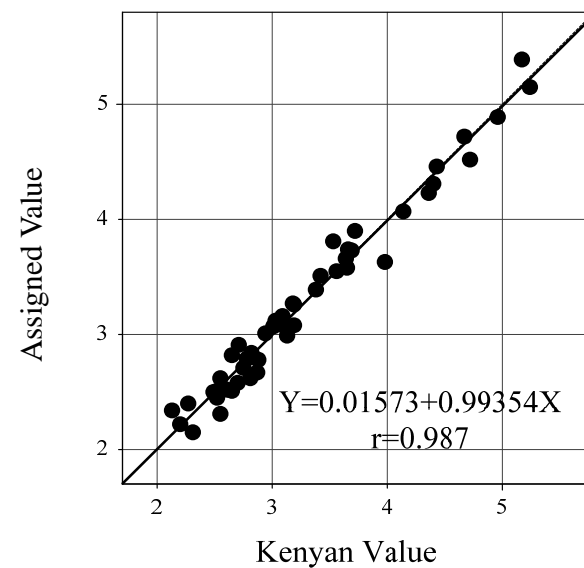

AST

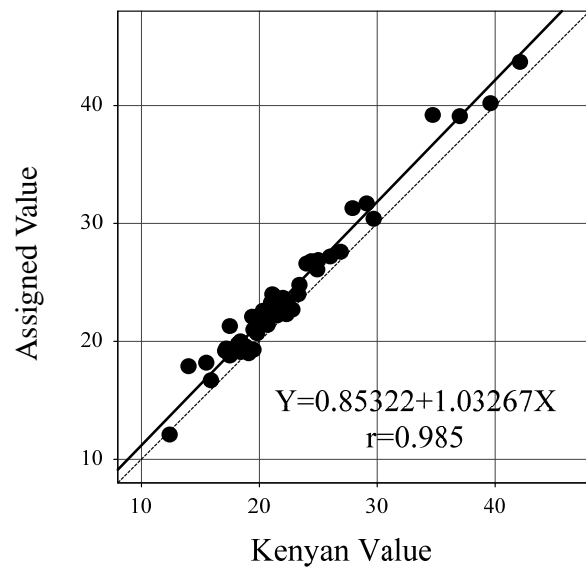

ALT

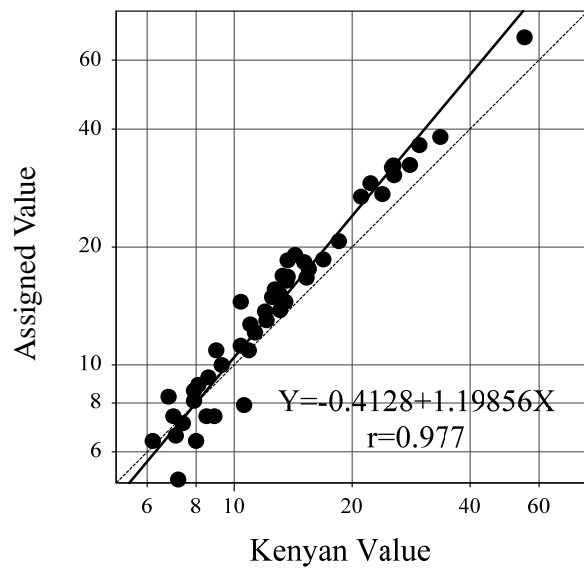

LDH

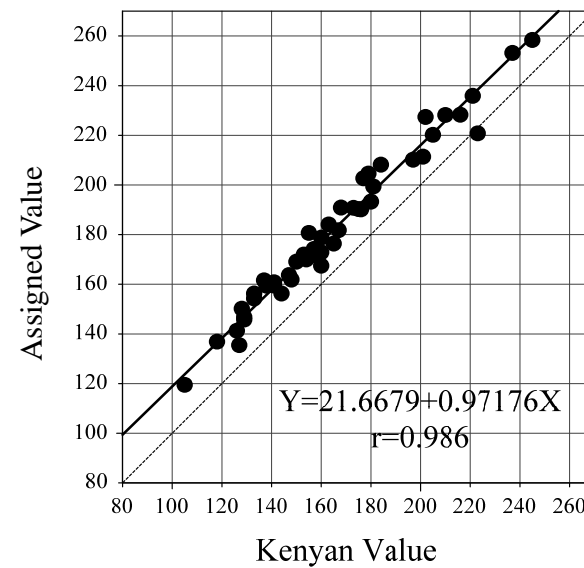

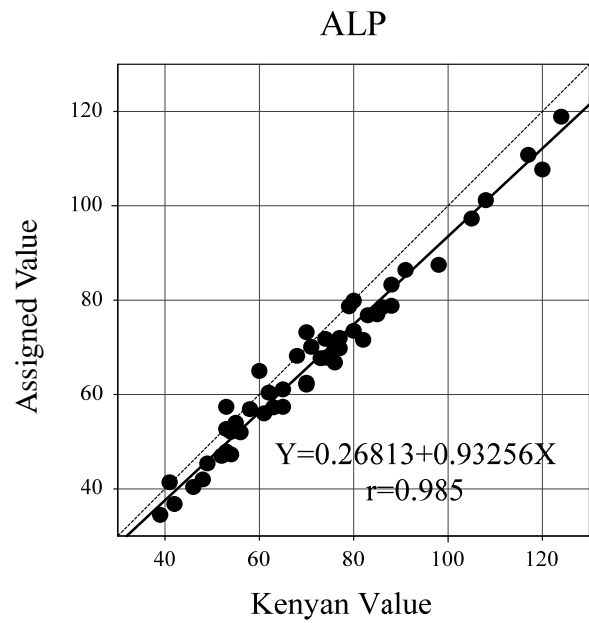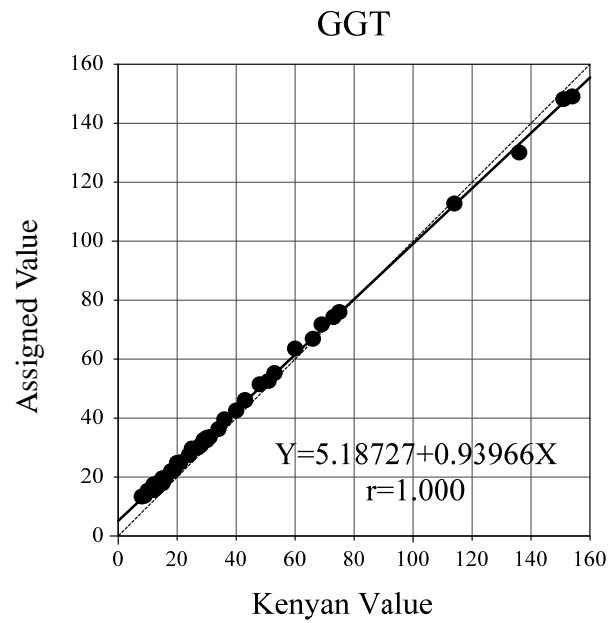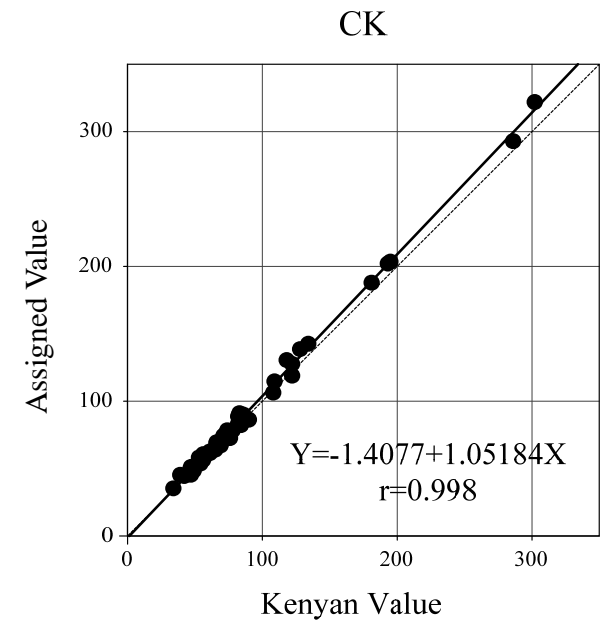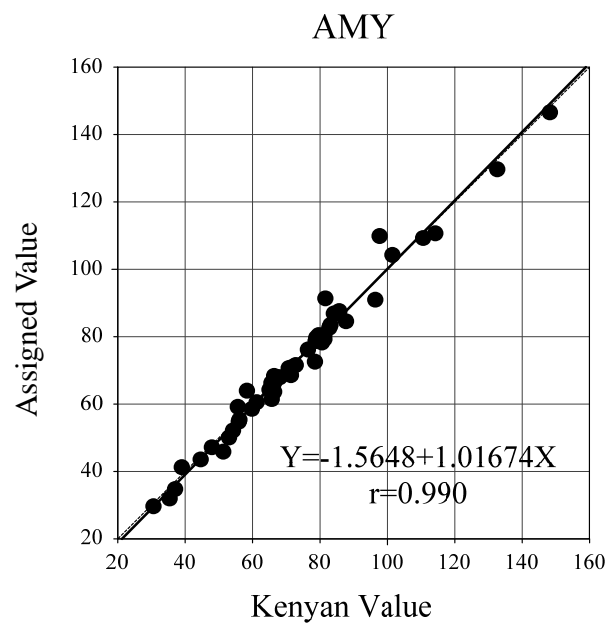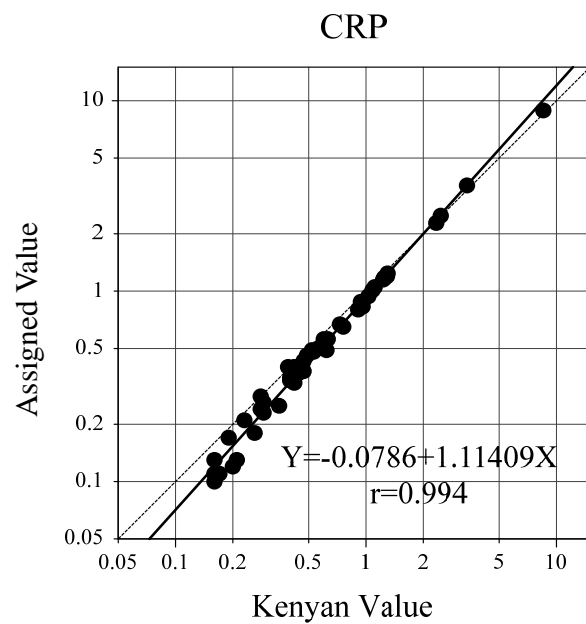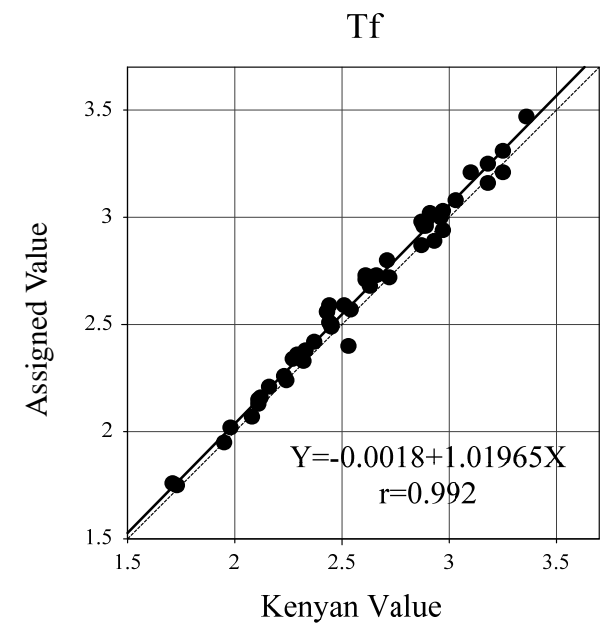

Supplement: pone.0235234.s004.pdf [file pone.0235234.s004.pdf]
