# Supplementary material for: Determination of reference intervals for common chemistry and immunoassay tests for Kenyan adults based on an internationally harmonized protocol and up-to-date statistical methods
Source: PubMed Central journal article supplement (PMC7347104; doi:10.1371/journal.pone.0235234), 2020-07-09
Supplement: pone.0235234.s005.pdf [file pone.0235234.s005.pdf]

|        |        |     |         |         |               | Ris by parametric method |     |       |     |     |      |      |       |     |      |      |       | LAVE effect on LL |      |      |        |       |       | LAVE effect on UL |       |                  |                  |                  |                  | btw-sex diff     |                  | btw-age diff     |                  | btw-age diff |  | Decision |  |                                  |  |                                   |                                   |                                              |                                   |  |  |
|--------|--------|-----|---------|---------|---------------|--------------------------|-----|-------|-----|-----|------|------|-------|-----|------|------|-------|-------------------|------|------|--------|-------|-------|-------------------|-------|------------------|------------------|------------------|------------------|------------------|------------------|------------------|------------------|--------------|--|----------|--|----------------------------------|--|-----------------------------------|-----------------------------------|----------------------------------------------|-----------------------------------|--|--|
| Item   | Units  | RU  | SDR sex | SDR age | LAVE criteria | LAVE                     | Age | M + F |     |     |      | M    |       |     |      | F    |       |                   |      | M+F  | M      | F     | M+F   | M                 | F     | BR <sub>LL</sub> | BR <sub>UL</sub> | BR <sub>LL</sub> | BR <sub>UL</sub> | BR <sub>LL</sub> | BR <sub>UL</sub> | BR <sub>LL</sub> | BR <sub>UL</sub> |              |  |          |  |                                  |  |                                   |                                   |                                              |                                   |  |  |
|        |        |     |         |         |               |                          |     | n     | LL  | Me  | UL   | n    | LL    | Me  | UL   | n    | LL    | Me                | UL   |      |        |       |       |                   |       |                  |                  |                  |                  |                  |                  |                  |                  |              |  |          |  |                                  |  |                                   |                                   |                                              |                                   |  |  |
| HDL-C  | mmol/L | 0.1 | 0.31    | 0.00    | 0.00          | 1                        | (+) | All   | 395 | 0.8 | 1.2  | 1.8  | 198   | 0.7 | 1.1  | 1.7  | 218   | 0.8               | 1.2  | 1.8  | HDL-C  | -0.39 | 0.00  | 0.00              | -0.39 | 0.00             | 0.00             | -0.39            | -0.39            |                  |                  |                  |                  |              |  |          |  | LAVE- with its effect of ≤2RU    |  |                                   |                                   |                                              |                                   |  |  |
| HDLrat |        | 0.1 | 0.34    | 0.38    | 0.45          | 1                        | (-) | All   | 530 | 2.5 | 4.0  | 7.0  | 259   | 2.6 | 4.3  | 7.6  | 271   | 2.5               | 3.8  | 6.1  | HDLrat | -0.11 | -0.18 | 0.00              | 0.74  | 0.36             | 0.36             | 0.09             | 1.31             |                  |                  |                  |                  |              |  |          |  | Partition by age (female). LAVE- |  |                                   |                                   |                                              |                                   |  |  |
|        |        |     |         |         |               |                          |     | 1     | (+) | 396 | 2.6  | 3.9  | 6.3   | 198 | 2.8  | 4.3  | 7.2   | 219               | 2.5  | 3.8  |        | 5.8   | 0.32  | 1.48              |       |                  |                  |                  |                  |                  |                  |                  |                  |              |  |          |  |                                  |  |                                   |                                   |                                              |                                   |  |  |
|        |        |     |         |         |               |                          |     | 1     | (-) | 348 | 2.5  | 3.9  | 6.6   | 175 | 2.7  | 4.2  | 7.2   | 174               | 2.4  | 3.6  |        | 5.9   | 0.29  | 1.24              | 0.16  | -0.47            | -0.33            | -0.87            |                  |                  |                  |                  |                  |              |  |          |  |                                  |  |                                   |                                   |                                              |                                   |  |  |
|        |        |     |         |         |               |                          |     | 1     | (+) | 285 | 2.6  | 3.8  | 6.1   | 144 | 2.8  | 4.1  | 6.7   | 145               | 2.4  | 3.6  |        | 5.7   | 0.45  | 1.12              | 0.27  | -0.53            | -0.36            | -0.83            |                  |                  |                  |                  |                  |              |  |          |  |                                  |  |                                   |                                   |                                              |                                   |  |  |
|        |        |     |         |         |               |                          |     | 1     | (-) | 182 | 2.7  | 4.3  | 7.5   | 83  | 2.5  | 4.7  | 7.8   | 98                | 2.7  | 4.0  |        | 6.7   | -0.16 | 0.90              |       |                  |                  |                  |                  |                  |                  |                  |                  |              |  |          |  |                                  |  |                                   |                                   |                                              |                                   |  |  |
| nonHDL | mmol/L | 0.1 | 0.00    | 0.32    | 0.35          | 1                        | (+) | All   | 532 | 2.0 | 3.4  | 5.6  | 260   | 2.1 | 3.5  | 5.9  | 273   | 2.0               | 3.3  | 5.3  | nonHDL | 0.00  | 0.00  | 0.00              | 0.08  | 0.41             | 0.32             | -0.17            | 0.75             |                  |                  |                  |                  |              |  |          |  |                                  |  | No partition by sex or age. LAVE- |                                   |                                              |                                   |  |  |
|        |        |     |         |         |               |                          |     | 1     | (-) | 409 | 2.0  | 3.4  | 5.3   | 203 | 2.1  | 3.5  | 5.6   | 223               | 2.0  | 3.3  |        | 5.2   | 0.11  | 0.65              |       |                  |                  |                  |                  |                  |                  |                  |                  |              |  |          |  |                                  |  |                                   |                                   |                                              |                                   |  |  |
|        |        |     |         |         |               |                          |     | 1     | (+) | 533 | 1.5  | 2.8  | 4.7   | 260 | 1.6  | 2.9  | 4.8   | 273               | 1.6  | 2.8  |        | 4.6   | 0.12  | 0.48              |       |                  |                  |                  |                  |                  |                  |                  |                  |              |  |          |  |                                  |  |                                   |                                   |                                              |                                   |  |  |
|        |        |     |         |         |               |                          |     | 1     | (-) | 396 | 1.7  | 2.8  | 4.5   | 198 | 1.7  | 2.9  | 4.8   | 219               | 1.6  | 2.8  |        | 4.5   | 0.00  | 0.25              |       |                  |                  |                  |                  |                  |                  |                  |                  |              |  |          |  |                                  |  |                                   |                                   |                                              |                                   |  |  |
|        |        |     |         |         |               |                          |     | 1     | (+) | 350 | 1.5  | 2.7  | 4.5   | 176 | 1.6  | 2.8  | 4.7   | 174               | 1.5  | 2.6  |        | 4.2   | 0.13  | 0.65              | -0.12 | -0.37            | -0.26            | -0.91            |                  |                  |                  |                  |                  |              |  |          |  |                                  |  |                                   |                                   |                                              |                                   |  |  |
| LDL-C  | mmol/L | 0.1 | 0.00    | 0.35    | 0.43          | 1                        | (-) | All   | 533 | 1.5 | 2.8  | 4.7  | 260   | 1.6 | 2.9  | 4.8  | 273   | 1.6               | 2.8  | 4.6  | LDL-C  | -0.28 | -0.13 | 0.00              | 0.28  | 0.00             | 0.14             | 0.14             | 0.42             |                  |                  |                  |                  |              |  |          |  |                                  |  |                                   |                                   | Partition by age for female. LAVE-           |                                   |  |  |
|        |        |     |         |         |               |                          |     | 1     | (+) | 396 | 1.7  | 2.8  | 4.5   | 198 | 1.7  | 2.9  | 4.8   | 219               | 1.6  | 2.8  |        | 4.5   | 0.13  | 0.65              | -0.12 | -0.37            | -0.26            | -0.91            |                  |                  |                  |                  |                  |              |  |          |  |                                  |  |                                   |                                   |                                              |                                   |  |  |
|        |        |     |         |         |               |                          |     | 1     | (-) | 350 | 1.5  | 2.7  | 4.5   | 176 | 1.6  | 2.8  | 4.7   | 174               | 1.5  | 2.6  |        | 4.2   | 0.29  | 0.73              | -0.25 | -0.76            | -0.54            | -1.08            |                  |                  |                  |                  |                  |              |  |          |  |                                  |  |                                   |                                   |                                              |                                   |  |  |
|        |        |     |         |         |               |                          |     | 1     | (+) | 285 | 1.6  | 2.7  | 4.3   | 145 | 1.7  | 2.8  | 4.6   | 145               | 1.5  | 2.6  |        | 4.1   | 0.00  | 0.12              |       |                  |                  |                  |                  |                  |                  |                  |                  |              |  |          |  |                                  |  |                                   |                                   |                                              |                                   |  |  |
|        |        |     |         |         |               |                          |     | 1     | (-) | 183 | 1.7  | 3.1  | 5.0   | 84  | 1.7  | 3.2  | 5.0   | 99                | 1.7  | 3.0  |        | 4.9   | 0.00  | 0.38              |       |                  |                  |                  |                  |                  |                  |                  |                  |              |  |          |  |                                  |  |                                   |                                   |                                              |                                   |  |  |
| Lip    | U/L    | 1   | 0.06    | 0.16    | 0.14          | 1                        | (-) | All   | 527 | 9   | 27   | 68   | 257   | 8   | 29   | 75   | 272   | 10                | 25   | 63   | Lip    | 0.00  | 0.00  | 0.08              | 0.29  | 0.25             | 0.23             | -0.13            | 0.80             |                  |                  |                  |                  |              |  |          |  |                                  |  |                                   |                                   | No partition by sex or age. LAVE-            |                                   |  |  |
|        |        |     |         |         |               |                          |     | 1     | (+) | 392 | 9    | 26   | 64    | 194 | 8    | 29   | 71    | 218               | 9    | 24   |        | 60    | -0.07 | 0.78              |       |                  |                  |                  |                  |                  |                  |                  |                  |              |  |          |  |                                  |  |                                   |                                   |                                              |                                   |  |  |
|        |        |     |         |         |               |                          |     | 1     | (-) | 528 | 8    | 18   | 55    | 259 | 10   | 22   | 64    | 269               | 7    | 15   |        | 35    | 0.25  | 2.42              |       |                  |                  |                  |                  |                  |                  |                  |                  |              |  |          |  |                                  |  |                                   |                                   |                                              |                                   |  |  |
|        |        |     |         |         |               |                          |     | 1     | (+) | 412 | 8    | 16   | 39    | 202 | 10   | 22   | 55    | 229               | 7    | 14   |        | 30    | 0.18  | 2.49              | -0.22 | -0.65            | 0.00             | -0.42            |                  |                  |                  |                  |                  |              |  |          |  |                                  |  |                                   |                                   |                                              |                                   |  |  |
|        |        |     |         |         |               |                          |     | 1     | (-) | 347 | 7    | 16   | 51    | 176 | 9    | 21   | 61    | 173               | 7    | 13   |        | 33    | -0.13 | 0.00              | 0.00  | 1.70             | 1.44             | 0.71             | 0.26             | 2.35             | -0.35            | -1.31            | -0.17            | 0.00         |  |          |  |                                  |  |                                   |                                   |                                              |                                   |  |  |
| ALT    | IU/L   | 1   | 0.59    | 0.20    | 0.51          | 1                        | (+) | All   | 283 | 8   | 15   | 38   | 144   | 9   | 20   | 47   | 144   | 7                 | 13   | 29   | ALT    | 0.00  | -0.08 | -0.19             | 1.24  | 0.64             | 1.31             | 0.52             | 3.40             |                  |                  |                  |                  |              |  |          |  |                                  |  |                                   |                                   | Partition by sex, LAVE+. No partition by age |                                   |  |  |
|        |        |     |         |         |               |                          |     | 1     | (-) | 181 | 10   | 20   | 60    | 84  | 12   | 25   | 70    | 96                | 7    | 18   |        | 36    | 0.39  | 2.67              |       |                  |                  |                  |                  |                  |                  |                  |                  |              |  |          |  |                                  |  |                                   |                                   |                                              |                                   |  |  |
|        |        |     |         |         |               |                          |     | 1     | (+) | 148 | 10   | 19   | 48    | 66  | 13   | 25   | 62    | 81                | 8    | 17   |        | 29    | 0.00  | 0.34              | 2.22  |                  |                  |                  |                  |                  |                  |                  |                  |              |  |          |  |                                  |  |                                   |                                   |                                              |                                   |  |  |
|        |        |     |         |         |               |                          |     | 1     | (-) | 525 | 16   | 23   | 39    | 258 | 17   | 25   | 45    | 266               | 15   | 21   |        | 32    | 0.00  | 0.00              | 0.00  | 1.38             | 0.85             | 0.84             | 0.46             | 2.54             |                  |                  |                  |              |  |          |  |                                  |  |                                   |                                   |                                              |                                   |  |  |
|        |        |     |         |         |               |                          |     | 1     | (+) | 409 | 16   | 22   | 33    | 206 | 17   | 25   | 40    | 227               | 15   | 21   |        | 29    | 0.15  | -0.11             |       |                  |                  |                  |                  |                  |                  |                  |                  |              |  |          |  |                                  |  |                                   |                                   |                                              |                                   |  |  |
| ALP    | IU/L   | 1   | 0.00    | 0.17    | 0.69          | 1                        | (-) | All   | 531 | 50  | 85   | 153  | 260   | 53  | 88   | 153  | 270   | 49                | 83   | 156  | ALP    | 0.00  | -0.04 | 0.04              | 0.08  | 0.00             | 0.31             | 0.26             | 0.98             | 0.04             | 0.08             | -0.29            | -1.61            |              |  |          |  |                                  |  |                                   |                                   | Partition by age for females. LAVE-          |                                   |  |  |
|        |        |     |         |         |               |                          |     | 1     | (+) | 394 | 50   | 84   | 151   | 198 | 54   | 87   | 153   | 218               | 48   | 81   |        | 148   | 0.23  | 0.19              |       |                  |                  |                  |                  |                  |                  |                  |                  |              |  |          |  |                                  |  |                                   |                                   |                                              |                                   |  |  |
|        |        |     |         |         |               |                          |     | 1     | (-) | 347 | 50   | 81   | 142   | 176 | 53   | 86   | 153   | 172               | 47   | 77   |        | 130   | 0.26  | 0.98              | 0.04  | 0.08             | -0.29            | -1.61            |                  |                  |                  |                  |                  |              |  |          |  |                                  |  |                                   |                                   |                                              |                                   |  |  |
|        |        |     |         |         |               |                          |     | 1     | (+) | 282 | 50   | 80   | 142   | 145 | 54   | 87   | 156   | 144               | 47   | 75   |        | 129   | 0.30  | 1.15              | 0.16  | 0.00             | -0.24            | -1.41            |                  |                  |                  |                  |                  |              |  |          |  |                                  |  |                                   |                                   |                                              |                                   |  |  |
|        |        |     |         |         |               |                          |     | 1     | (-) | 183 | 54   | 95   | 163   | 84  | 52   | 92   | 151   | 99                | 55   | 100  |        | 174   | -0.11 | -0.83             |       |                  |                  |                  |                  |                  |                  |                  |                  |              |  |          |  |                                  |  |                                   |                                   |                                              |                                   |  |  |
| AMY    | IU/L   | 1   | 0.02    | 0.00    | 0.00          | 1                        | (+) | All   | 530 | 47  | 87   | 164  | 258   | 48  | 87   | 163  | 272   | 45                | 85   | 160  | AMY    | 0.00  | -0.04 | 0.04              | 0.37  | 0.07             | 0.21             | 0.18             | 0.26             |                  |                  |                  |                  |              |  |          |  |                                  |  |                                   |                                   |                                              | No partition by sex or age. LAVE- |  |  |
|        |        |     |         |         |               |                          |     | 1     | (-) | 394 | 47   | 87   | 154   | 197 | 49   | 90   | 161   | 218               | 44   | 85   |        | 154   | -0.10 | -0.13             |       |                  |                  |                  |                  |                  |                  |                  |                  |              |  |          |  |                                  |  |                                   |                                   |                                              |                                   |  |  |
|        |        |     |         |         |               |                          |     | 1     | (+) | 530 | 138  | 189  | 257   | 259 | 136  | 187  | 255   | 271               | 139  | 190  |        | 259   | 0.00  | 0.00              | 0.00  | 1.14             | 0.42             | 1.82             | -0.01            | -0.24            |                  |                  |                  |              |  |          |  |                                  |  |                                   |                                   |                                              |                                   |  |  |
|        |        |     |         |         |               |                          |     | 1     | (-) | 409 | 136  | 187  | 249   | 207 | 139  | 186  | 250   | 225               | 138  | 189  |        | 250   | 0.00  | 0.00              | 0.00  | 1.14             | 0.42             | 1.82             | -0.01            | -0.24            |                  |                  |                  |              |  |          |  |                                  |  |                                   |                                   |                                              |                                   |  |  |
|        |        |     |         |         |               |                          |     | 1     | (+) | 529 | 61   | 139  | 380   | 259 | 72   | 167  | 460   | 268               | 53   | 119  |        | 260   | 0.23  | 2.46              |       |                  |                  |                  |                  |                  |                  |                  |                  |              |  |          |  |                                  |  |                                   |                                   |                                              |                                   |  |  |
| LDH    | IU/L   | 1   | 0.00    | 0.00    | 0.28          | 1                        | (-) | All   | 406 | 58  | 135  | 332  | 203   | 76  | 172  | 440  | 219   | 54                | 119  | 277  | LDH    | 0.04  | -0.04 | -0.02             | 0.69  | 0.22             | -0.30            | 0.31             | 2.33             |                  |                  |                  |                  |              |  |          |  |                                  |  |                                   |                                   |                                              | No partition by sex or age. LAVE- |  |  |
|        |        |     |         |         |               |                          |     | 1     | (+) | 524 | 12   | 25   | 88    | 257 | 12   | 31   | 105   | 269               | 10   | 21   |        | 50    | 0.10  | 2.84              |       |                  |                  |                  |                  |                  |                  |                  |                  |              |  |          |  |                                  |  |                                   |                                   |                                              |                                   |  |  |
|        |        |     |         |         |               |                          |     | 1     | (-) | 405 | 11   | 24   | 65    | 199 | 13   | 31   | 90    | 224               | 10   | 21   |        | 47    | 0.07  | -0.05             | 0.00  | 1.67             | 0.76             | 0.32             | 0.22             | 3.12             |                  |                  |                  |              |  |          |  |                                  |  |                                   |                                   |                                              |                                   |  |  |
|        |        |     |         |         |               |                          |     | 1     | (+) | 528 | 0.22 | 1.22 | 18.86 | 255 | 0.20 | 1.01 | 14.35 | 273               | 0.23 | 1.54 |        | 20.2  | 0.00  | 0.00              | 0.00  | 1.14             | 0.42             | 1.82             | -0.01            | -0.24            |                  |                  |                  |              |  |          |  |                                  |  |                                   |                                   |                                              |                                   |  |  |
|        |        |     |         |         |               |                          |     | 1     | (-) | 425 | 0.21 | 1.10 | 14.67 | 200 | 0.20 | 0.97 | 12.97 | 216               | 0.23 | 1.41 |        | 13.9  | 0.00  | 0.00              | 0.00  | 1.14             | 0.42             | 1.82             | -0.01            | -0.24            |                  |                  |                  |              |  |          |  |                                  |  |                                   |                                   |                                              |                                   |  |  |
| Fe     | μmol/L | 0.1 | 0.39    | 0.10    | 0.04          | 3                        | (-) | All   | 526 | 4.3 | 15.8 | 29.0 | 253   | 7.7 | 17.5 | 29.9 | 273   | 3.9               | 13.7 | 29.3 | Iron   | -0.88 | -0.44 | -0.65             | 0.02  | 0.25             | 0.00             | 0.45             | -0.12            |                  |                  |                  |                  |              |  |          |  |                                  |  |                                   | No partition by sex or age. LAVE+ |                                              |                                   |  |  |
|        |        |     |         |         |               |                          |     | 3     | (+) | 412 | 8.8  | 16.1 | 28.9  | 207 | 9.8  | 17.4 | 28.7  | 20                |      |      |        |       |       |                   |       |                  |                  |                  |                  |                  |                  |                  |                  |              |  |          |  |                                  |  |                                   |                                   |                                              |                                   |  |  |

|      |       |    |         |         |               |      |     |   |    | Ris by parametric method |    |   |    |    |    |   |    |    |    |      |                  |  |  |                  | LAVE effect on LL |   |                  | LAVE effect on UL |                  |                  | btw-sex diff     |                  | btw-age diff |  | btw-age diff |  | Decision |
|------|-------|----|---------|---------|---------------|------|-----|---|----|--------------------------|----|---|----|----|----|---|----|----|----|------|------------------|--|--|------------------|-------------------|---|------------------|-------------------|------------------|------------------|------------------|------------------|--------------|--|--------------|--|----------|
|      |       |    |         | M       | F             |      |     |   |    |                          |    |   |    |    |    |   |    |    |    |      |                  |  |  |                  |                   | M |                  | F                 |                  |                  |                  |                  |              |  |              |  |          |
|      |       |    |         | M + F   |               |      | M   |   |    |                          | F  |   |    |    |    |   |    |    |    |      |                  |  |  |                  |                   |   |                  |                   |                  |                  |                  |                  |              |  |              |  |          |
| Item | Units | RU | SDR sex | SDR age | LAVE criteria | LAVE | Age | n | LL | Me                       | UL | n | LL | Me | UL | n | LL | Me | UL | Item | BR <sub>LL</sub> |  |  | BR <sub>UL</sub> |                   |   | BR <sub>LL</sub> | BR <sub>UL</sub>  | BR <sub>LL</sub> | BR <sub>UL</sub> | BR <sub>LL</sub> | BR <sub>UL</sub> |              |  |              |  |          |

\*Reference tests used for LAVE

1. Alb, Glb, UA, Glu, TG, nonHDL, AST, ALT, LDH, GGT, CK, CRP
2. TP, Alb, Glb, IgG, IgA, IgM, CRP, WBC, PLT
3. Ferr, Fe, Tf, TFSat, Hb, Hct, MCV
4. Individuals positive with anti-thyroid antibodies were excluded.

Note:

1. SDRsex and SDRage: Bold interface represents value >0.4
2. Reporting unit (RU) represents a unit of value rounded up for reporting test results. If number of digit below decimal point is 2, 1, or 0, RU is 0.01, 0.1, or 1, respectively.  
If the width of RI (UL-LL) is comprised of more than 50 RU, we compute (UL-LL)×0.02 and round it up for use as RU.  
For example, if RI = 20~180, we first compute (180-20) × 0.02 = 3.3 and round it up to 5 for use as RU. Similarly, if RU=0.1 and RI=1.8~13.4, (13.4-1.8) × 0.02 =0.232 was rounded up as 0.2 for RU.  
RU was referred to when between subgroup difference at LL or UL expressed as BiasLL or BiasUL do not match with actual differences, which should be ≥3RU for partitioning.
3. Red bold font represents proposed RIs
4. BRLL and BRUL : Bold interface represents values < -0.375 or > 0.375
