# Supplementary material for: Determination of reference intervals for common chemistry and immunoassay tests for Kenyan adults based on an internationally harmonized protocol and up-to-date statistical methods
Source: PubMed Central journal article supplement (PMC7347104; doi:10.1371/journal.pone.0235234), 2020-07-09
Supplement: pone.0235234.s006.pdf [file pone.0235234.s006.pdf]

S2 Table. Comparison of reference intervals

| Test  | Units  | PRESENT STUDY KENYA |      |      |      |      |      |      | TURKEY (11) |      |      |      |      |      |       | INDIA (13) |       |      |      |      |      |      |     |
|-------|--------|---------------------|------|------|------|------|------|------|-------------|------|------|------|------|------|-------|------------|-------|------|------|------|------|------|-----|
|       |        | Age                 | M+F  |      | M    |      | F    |      | Age         | M+F  |      | M    |      | F    |       | Age        | M+F   |      | M    |      | F    |      |     |
| TP    | g/L    | 18-65               | LL   | UL   | LL   | UL   | LL   | UL   | 20-79       | LL   | UL   | LL   | UL   | LL   | UL    | 18-65      | LL    | UL   | LL   | UL   | LL   | UL   |     |
| Alb   | g/L    | 18-65               | 67   | 83   |      |      |      |      | 20-79       | 66   | 82   |      |      |      |       | 18-65      | 68    | 86   |      |      |      | 36   | 47  |
|       |        | 18-44               |      |      | 40   | 51   | 38   | 49   |             |      |      |      |      |      |       |            |       |      |      |      |      |      |     |
|       |        | 45-65               |      |      |      | 40   | 47   | 38   | 46          |      |      |      |      |      |       |            |       |      |      |      |      |      |     |
| Urea  | mmol/L | 18-65               |      |      | 2.4  | 6.6  |      |      | 20-49       |      |      | 2.95 | 7.20 | 2.21 | 6.12  | 18-65      |       |      | 2.2  | 6.0  |      |      |     |
|       |        | 18-44               |      |      |      |      | 1.8  | 5.3  |             |      |      |      |      | 2.85 | 7.96  | 18-45      |       |      |      |      | 1.9  | 5.1  |     |
|       |        | 45-65               |      |      |      |      | 1.9  | 6.2  | 50-79       |      |      |      |      |      |       |            | 46-65 |      |      |      |      | 2.4  | 6.7 |
| UA    | μmol/L | 18-65               |      |      | 243  | 507  | 178  | 417  | 20-79       |      |      | 226  | 458  | 166  | 345   | 18-65      |       |      | 248  | 509  | 159  | 404  |     |
| Cre   | μmol/L | 18-65               |      |      | 58   | 109  | 45   | 86   | 20-79       |      |      | 59   | 92   | 50   | 71    | 18-65      |       |      | 58   | 95   | 35   | 74   |     |
| TBil  | μmol/L | 18-65               |      |      | 6    | 43   | 5    | 27   | 20-79       |      |      | 3.8  | 24.1 | 2.7  | 15.9  | 18-65      |       |      | 6.2  | 23.7 | 4    | 17.3 |     |
| Na    | mmol/L | 18-65               | 134  | 142  |      |      |      |      | 20-79       | 137  | 144  |      |      |      |       | 18-65      | 135   | 146  |      |      |      |      |     |
| K     | mmol/L | 18-65               | 3.4  | 4.8  |      |      |      |      | 20-79       | 3.7  | 4.9  |      |      |      |       | 18-65      | 3.8   | 5    |      |      |      |      |     |
| Cl    | mmol/L | 18-65               | 100  | 110  |      |      |      |      | 20-79       | 99   | 107  |      |      |      |       | 18-65      | 102   | 113  |      |      |      |      |     |
| Ca    | mmol/L | 18-65               | 2.19 | 2.57 |      |      |      |      | 20-79       | 2.15 | 2.47 |      |      |      |       | 18-65      | 2.1   | 2.44 |      |      |      |      |     |
| IP    | mmol/L | 18-65               | 0.78 | 1.42 |      |      |      |      | 20-79       | 0.8  | 1.4  |      |      |      |       | 18-65      | 0.8   | 1.43 |      |      |      |      |     |
| Mg    | mmol/L | 18-65               |      |      | 0.73 | 0.98 |      |      | 20-79       | 0.77 | 1.06 |      |      |      |       | 18-65      | 0.77  | 1.07 |      |      |      |      |     |
|       |        | 18-44               |      |      |      |      | 0.71 | 0.93 |             |      |      |      |      |      |       |            |       |      |      |      |      |      |     |
|       |        | 45-65               |      |      |      |      | 0.76 | 1.01 |             |      |      |      |      |      |       |            |       |      |      |      |      |      |     |
| Glu   | mmol/L | 18-65               |      |      |      |      |      |      | 20-79       | 3.96 | 5.88 |      |      |      |       | 18-65      |       |      |      |      |      |      |     |
|       |        | 18-44               |      |      | 3.9  | 5.8  |      |      |             |      |      |      |      |      |       | 18-45      | 4.1   | 5.5  |      |      |      |      |     |
|       |        | 45-65               |      |      | 4.4  | 7.3  |      |      |             |      |      |      |      |      |       | 46-65      | 4.3   | 6.0  |      |      |      |      |     |
| TC    | mmol/L | 18-65               |      |      |      |      |      |      |             |      |      |      |      |      |       | 18-65      |       |      |      |      | 2.9  | 6.6  |     |
|       |        | 18-45               |      |      | 3.10 | 6.10 |      |      | 20-49       | 3.22 | 6.45 | 3.20 | 6.42 | 3.20 | 6.38  | 18-45      |       |      | 3.1  | 6.2  |      |      |     |
|       |        | 46-65               |      |      | 3.20 | 7.20 |      |      | 50-79       |      |      |      |      | 3.93 | 7.92  | 46-65      |       |      | 2.5  | 6.7  |      |      |     |
| TG    | mmol/L | 18-65               |      |      |      |      |      |      |             |      |      |      |      |      |       | 18-65      |       |      | 0.6  | 2.7  | 0.5  | 2.1  |     |
|       |        | 18-45               |      |      | 0.50 | 2.88 | 0.45 | 2.03 | 20-49       |      |      | 0.53 | 3.39 | 0.46 | 2.52  | 18-45      |       |      |      |      |      |      |     |
|       |        | 46-65               |      |      | 0.53 | 3.87 | 0.55 | 3.24 | 50-79       |      |      |      |      | 0.64 | 3.55  | 46-65      |       |      |      |      |      |      |     |
| HDL-C | mmol/L | 18-65               | 0.70 | 1.70 |      |      |      |      |             |      | 0.85 | 1.52 | 0.95 | 1.56 | 18-65 |            |       | 0.7  | 1.5  | 0.8  | 1.8  |      |     |
| LDL-C | mmol/L | 18-65               |      |      | 1.60 | 4.80 |      |      |             |      |      |      |      |      |       | 18-65      | 1.7   | 4.4  |      |      |      |      |     |
|       |        | 18-44               |      |      |      |      | 1.50 | 4.20 | 20-49       | 1.47 | 3.92 | 1.60 | 4.01 | 1.32 | 3.92  | 18-45      |       |      |      |      |      |      |     |
|       |        | 45-65               |      |      |      |      | 1.70 | 4.90 | 50-79       |      |      |      |      | 1.78 | 4.91  | 46-65      |       |      |      |      |      |      |     |
| Lip   | U/L    | 18-65               |      |      | 8    | 75   | 10   | 63   |             |      |      |      |      |      | 18-65 |            |       |      |      |      |      |      |     |
| ALT   | IU/L   | 18-65               |      |      | 10   | 55   | 7    | 30   |             |      | 9    | 57   | 7    | 28   | 18-65 |            |       | 15   | 74   | 10   | 37   |      |     |
| AST   | IU/L   | 18-65               |      |      | 17   | 40   | 15   | 29   |             |      | 13   | 30   | 11   | 25   | 18-65 |            |       | 20   | 53   | 17   | 39   |      |     |
| ALP   | IU/L   | 18-65               |      |      | 53   | 153  |      |      | 18-65       |      |      | 41   | 111  |      |       | 18-65      |       |      | 41   | 111  |      |      |     |
|       |        | 18-44               |      |      |      |      | 47   | 130  | 20-49       | 38   | 112  | 43   | 116  | 34   | 97    | 18-45      |       |      |      |      | 35   | 100  |     |
|       |        | 45-65               |      |      |      |      | 55   | 174  | 50-79       |      |      |      |      | 47   | 133   | 46-65      |       |      |      |      | 43   | 117  |     |
| AMY   | IU/L   | 18-65               | 47   | 164  |      |      |      |      | 34          | 119  |      |      |      |      | 18-65 | 36         | 135   |      |      |      |      |      |     |
| LDH   | IU/L   | 18-65               | 138  | 257  |      |      |      |      | 126         | 220  |      |      |      |      | 18-65 | 104        | 206   |      |      |      |      |      |     |
| CK    | IU/L   | 18-65               |      |      | 72   | 460  | 53   | 260  |             |      | 48   | 227  | 34   | 131  | 18-65 |            |       | 48   | 304  | 36   | 184  |      |     |
| GGT   | IU/L   | 18-65               |      |      | 13   | 90   | 10   | 47   |             |      | 11   | 69   | 7    | 33   | 18-65 |            |       | 14   | 62   | 11   | 40   |      |     |
| Fe    | μmol/L | 18-65               | 8.8  | 28.9 |      |      |      |      |             |      | 5.9  | 31.6 | 3.5  | 27.8 | 18-65 |            |       | 7    | 33   | 4    | 26   |      |     |
| Ferr  | μg/L   | 18-65               |      |      | 20   | 457  |      |      | 18-79       |      |      |      |      | 4.7  | 136   | 18-65      |       |      |      |      |      |      |     |
|       |        | 18-44               |      |      |      |      | 5    | 150  | 18-44       |      |      | 13   | 276  | 4.3  | 91    |            |       |      |      |      |      |      |     |
|       |        | 45-65               |      |      |      |      | 12   | 232  | 45-79       |      |      |      |      | 5.9  | 175   |            |       |      |      |      |      |      |     |
| Tf    | g/L    | 18-65               |      |      | 1.9  | 3.2  | 2.0  | 3.5  | 18-79       | 1.8  | 3.3  | 1.8  | 3.3  | 1.9  | 3.5   | 18-65      | 2.2   | 4    |      |      |      |      |     |
| TfSat | %      | 18-65               | 13   | 47   |      |      |      |      |             |      |      |      |      |      | 18-65 |            |       |      |      |      |      |      |     |
| CRP   | mg/L   | 18-65               | 0.21 | 14.7 |      |      |      |      |             |      |      |      |      |      | 18-65 |            |       | 0.33 | 7.34 | 0.35 | 11.9 |      |     |
| IgA   | g/L    | 18-65               | 1.05 | 4.63 |      |      |      |      |             |      |      |      |      |      | 18-65 | 0.94       | 4.35  |      |      |      |      |      |     |
| IgG   | g/L    | 18-65               | 11.1 | 20.0 |      |      |      |      |             |      |      |      |      |      | 18-65 | 9.1        | 20.4  |      |      |      |      |      |     |
| IgM   | g/L    | 18-65               |      |      | 0.38 | 2.29 | 0.51 | 2.77 |             |      |      |      |      |      | 18-65 |            |       | 0.4  | 2.54 | 0.51 | 3.1  |      |     |
| FT3   | pmol/L | 18-65               | 3.9  | 6.3  |      |      |      |      |             |      |      |      |      |      | 18-65 |            |       |      |      |      |      |      |     |
| FT4   | pmol/L | 18-65               | 7.8  | 14.1 |      |      |      |      |             |      |      |      |      |      | 18-65 |            |       |      |      |      |      |      |     |
| TSH   | mIU/L  | 18-65               | 0.61 | 4.86 |      |      |      |      |             |      |      |      |      |      | 18-65 |            |       |      |      |      |      |      |     |
| PSA   | μg/L   | 18-65               |      |      | 0.25 | 2.95 |      |      |             |      |      |      |      |      | 18-65 |            |       |      |      |      |      |      |     |
